# Supplementary material
Source: MDPI journal article supplement (https://www.mdpi.com/2073-4433/13/3/416)

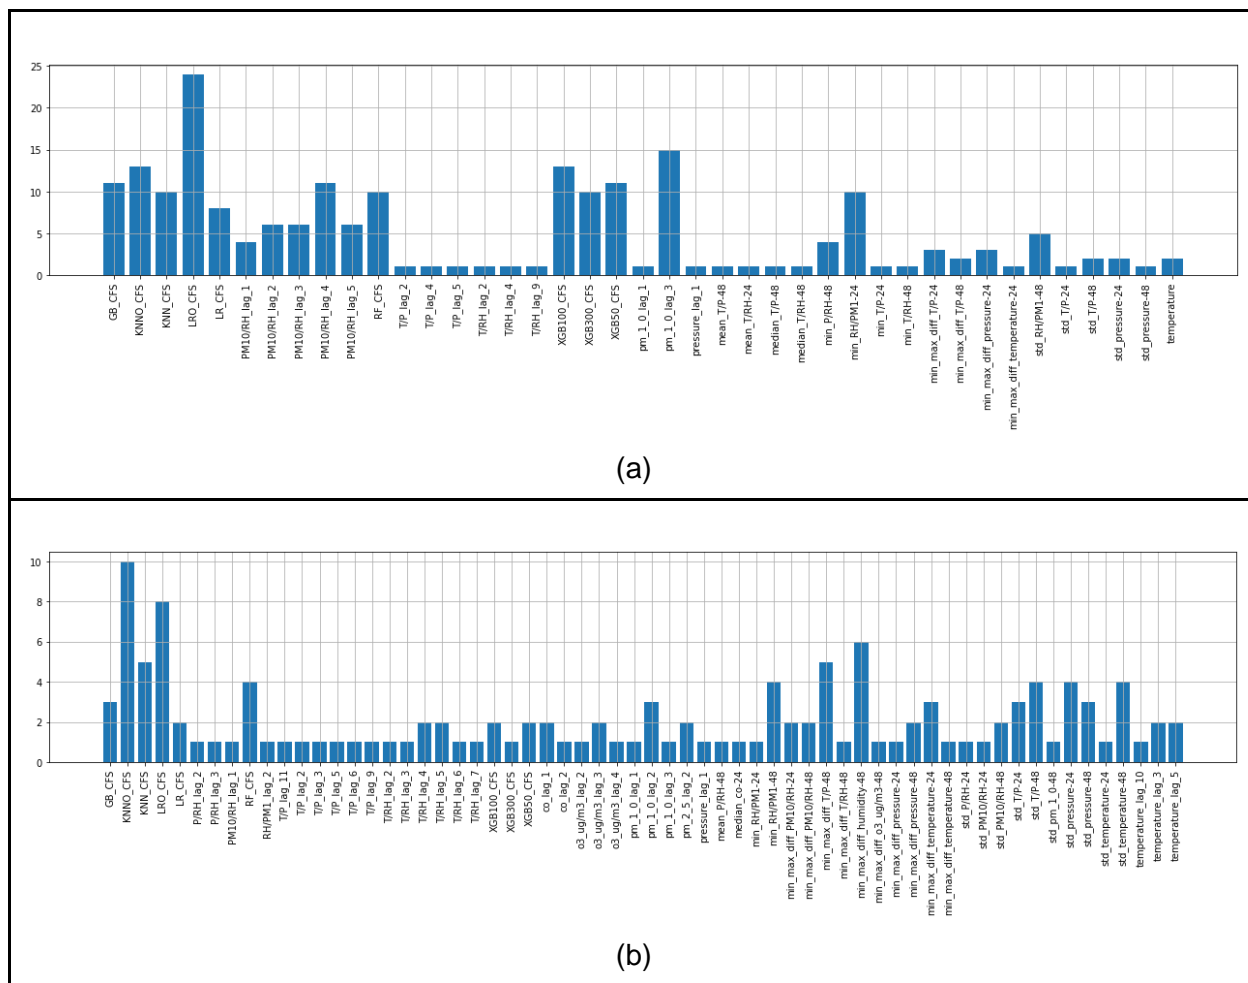

Figure S1: Chosen features and models by the GA stacking. (a) corresponds to PM10 and (b) to O3.

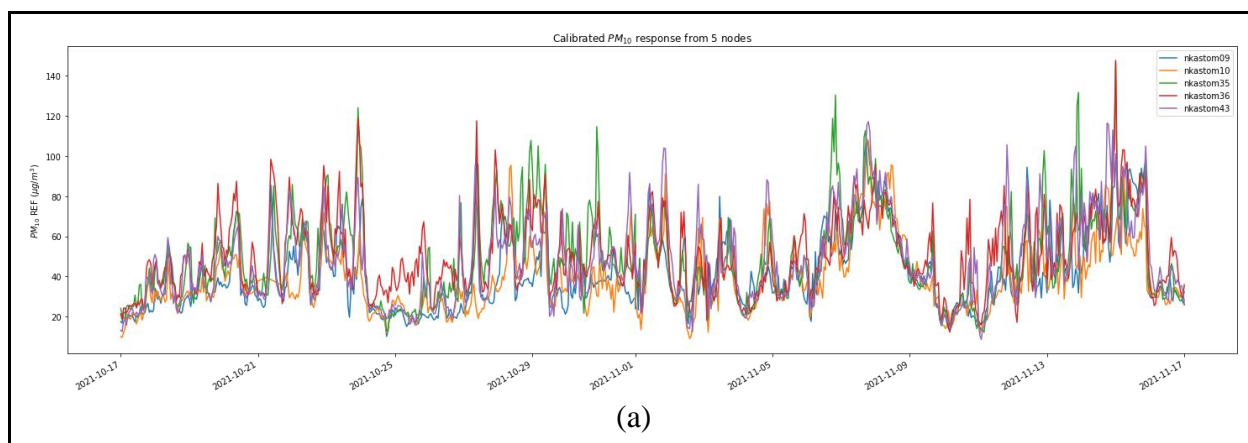

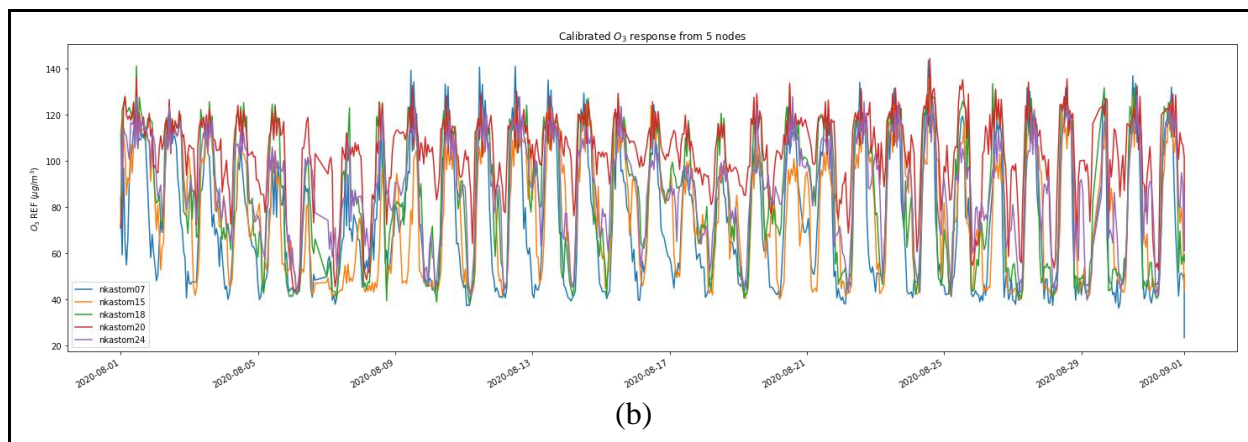

Figure S2: The calibrated output of the GA-stacking framework of 5 novel to the models nodes are presented for PM<sub>10</sub> (a) and O<sub>3</sub> pollutants (b).

Figure S3: The calibrated output against reference readings for visual validation is presented in the right subfigure and the linearity is presented in the left. The results refer to the PM<sub>10</sub> levels for the KORDELIO collocated node-reference pair for the ideal scenario.

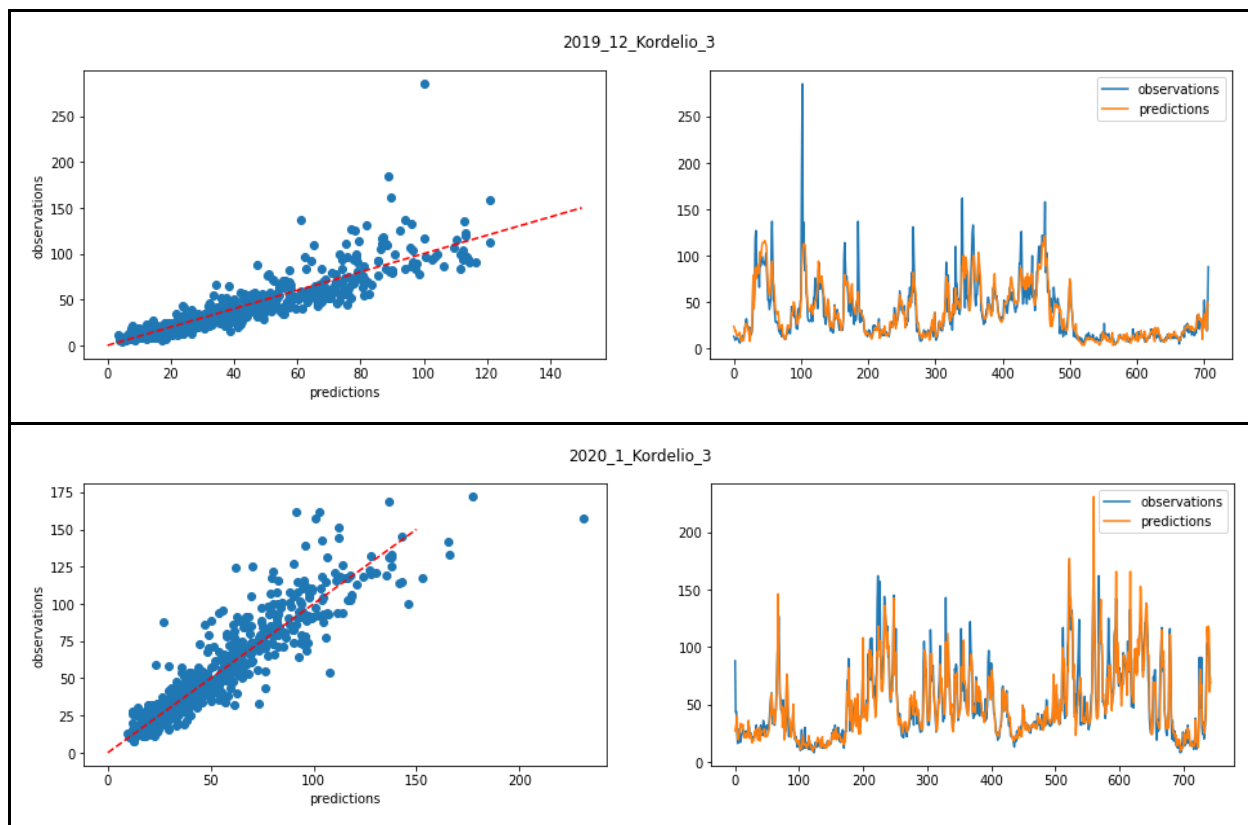

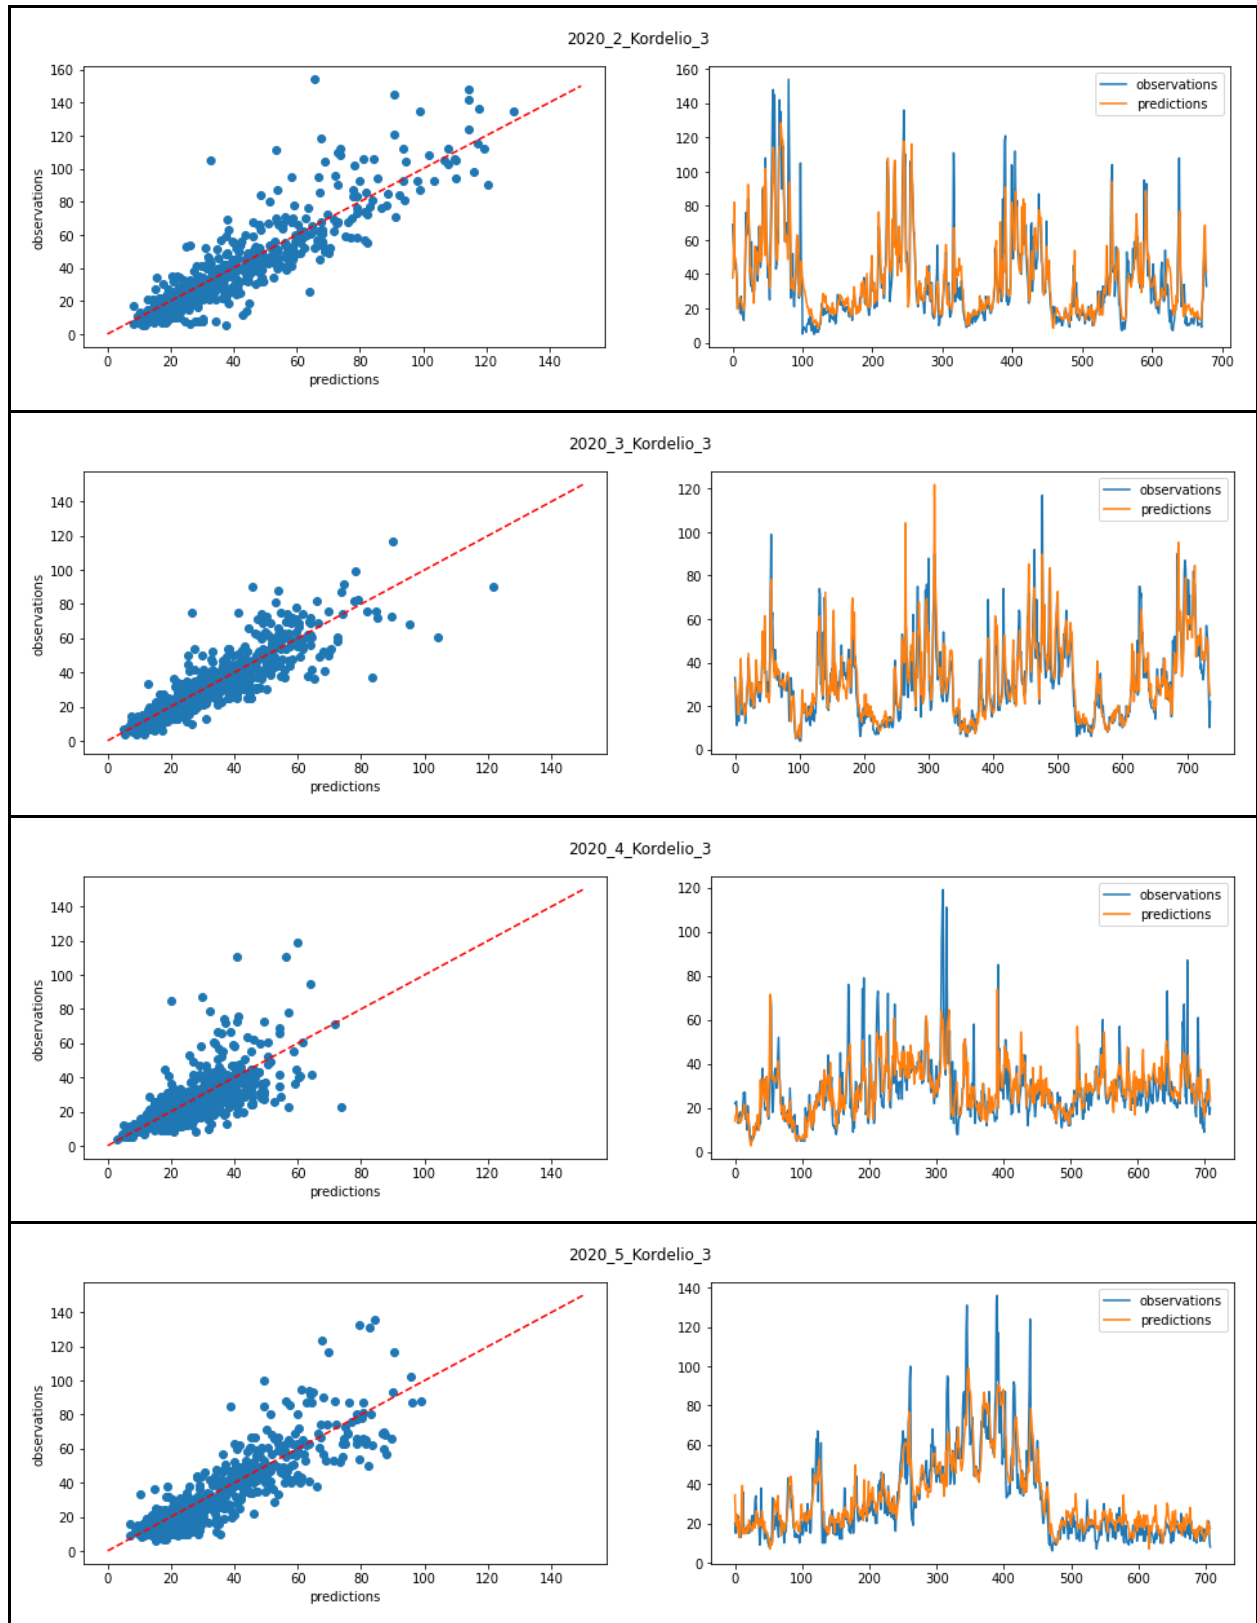

2020\_6\_Kordelio\_3

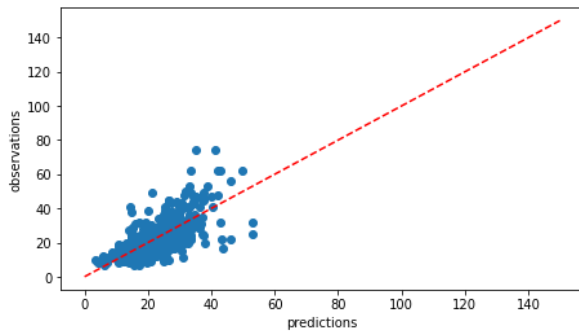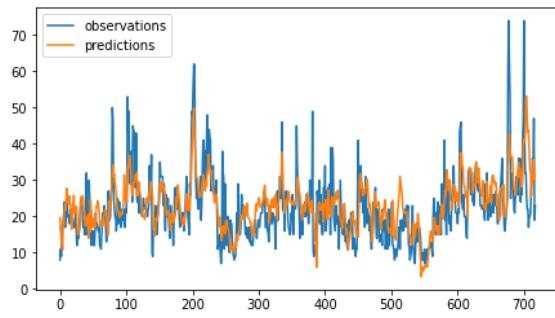

2020\_7\_Kordelio\_3

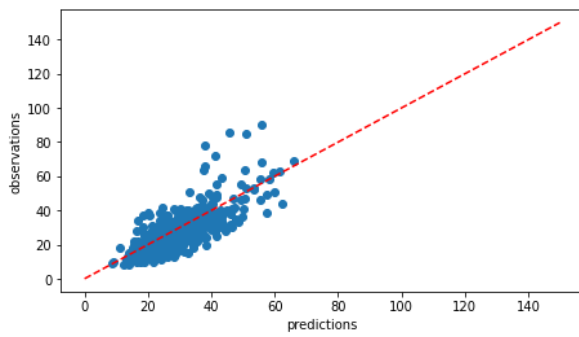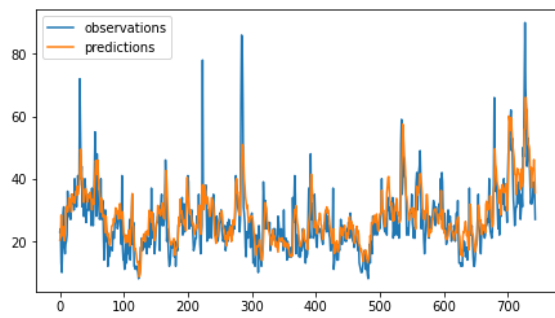

2020\_8\_Kordelio\_3

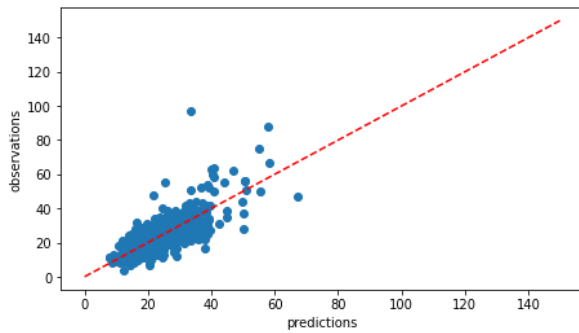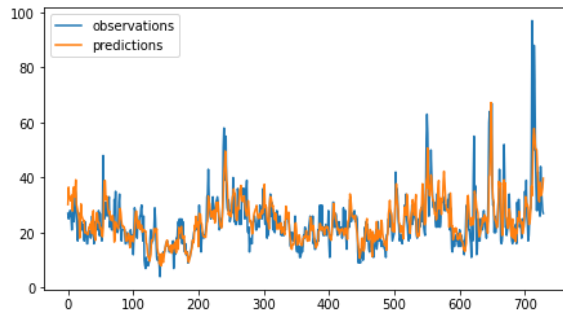

2020\_9\_Kordelio\_3

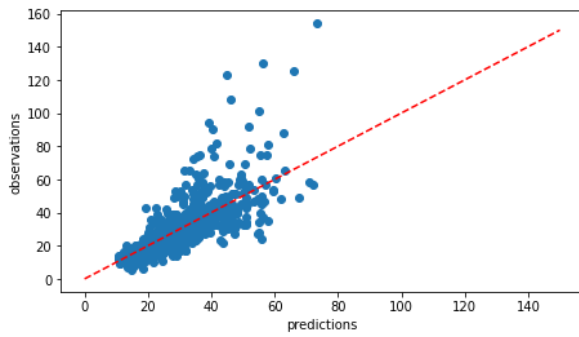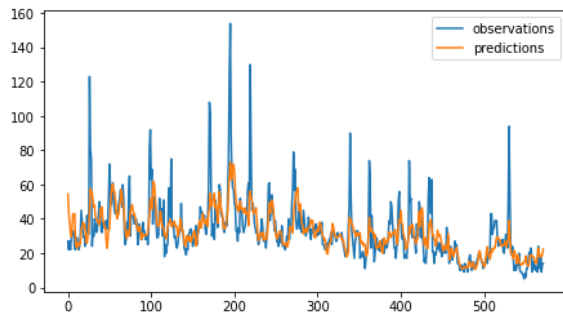

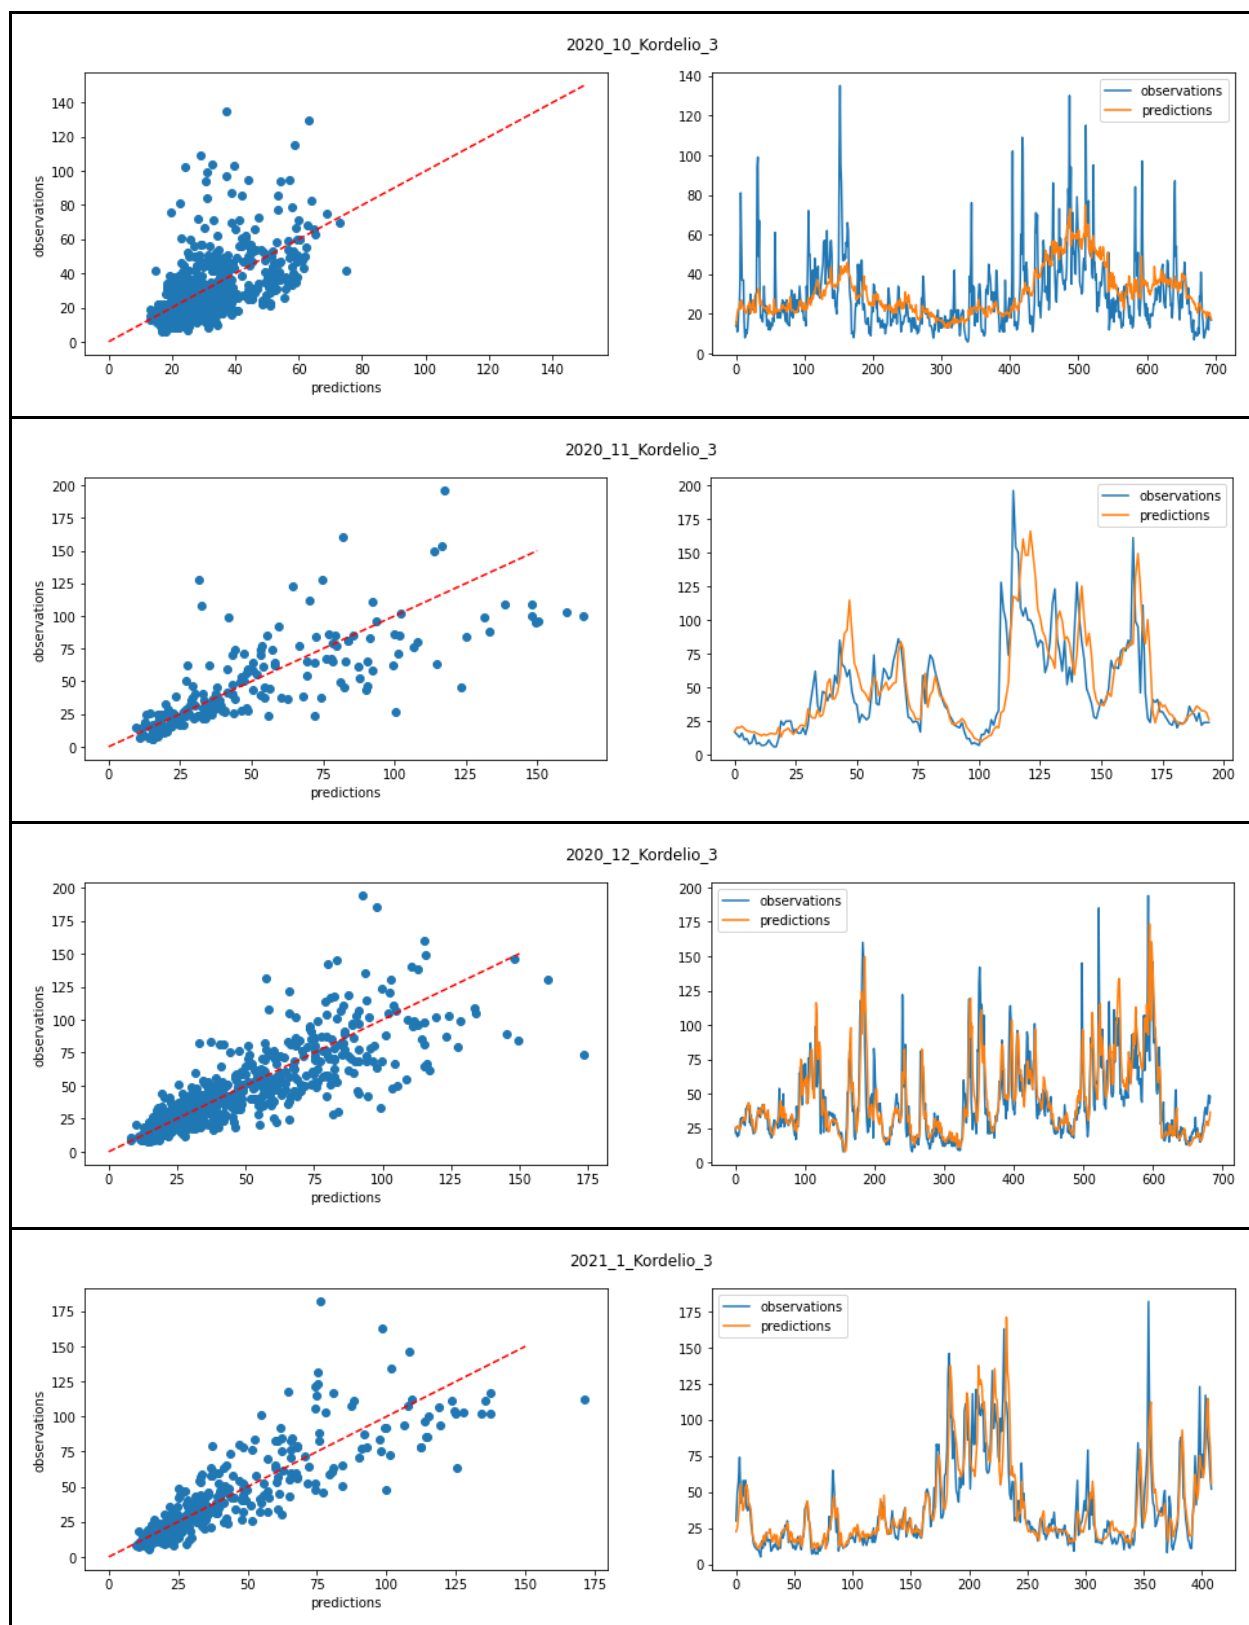

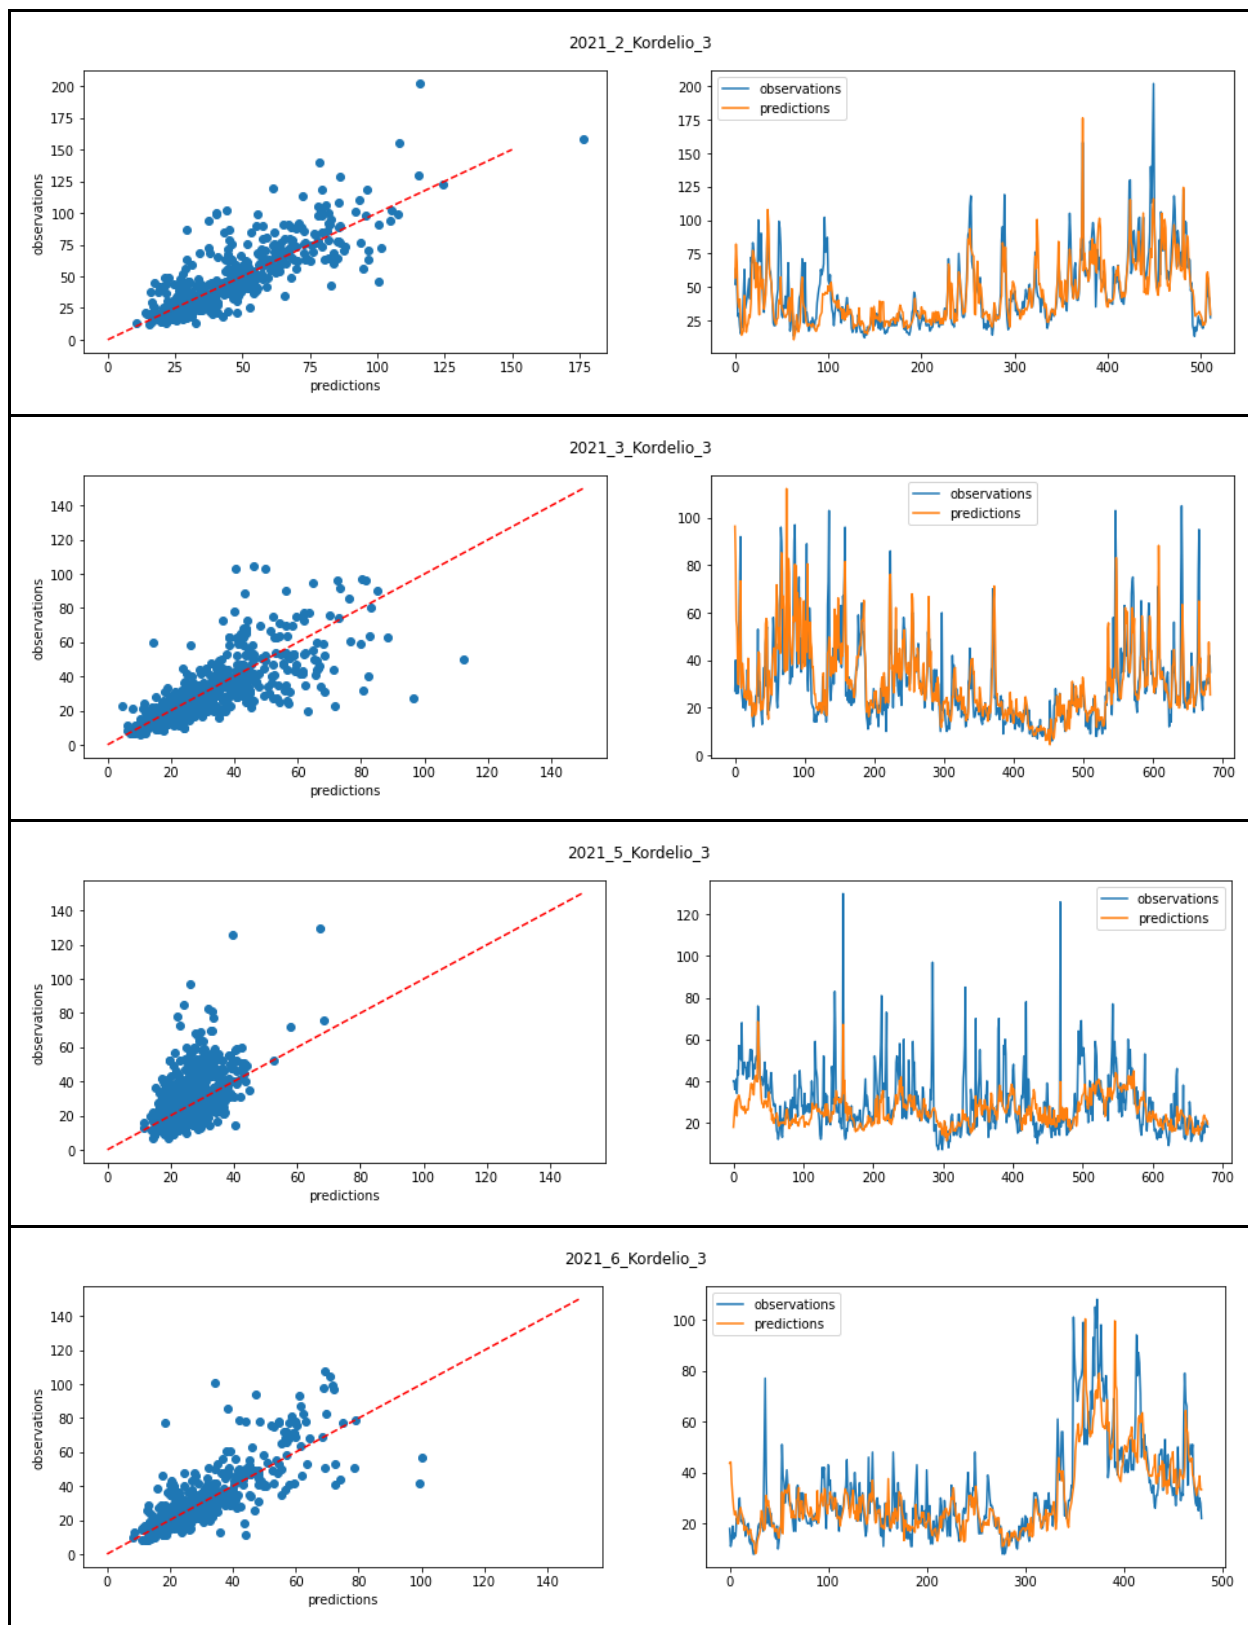

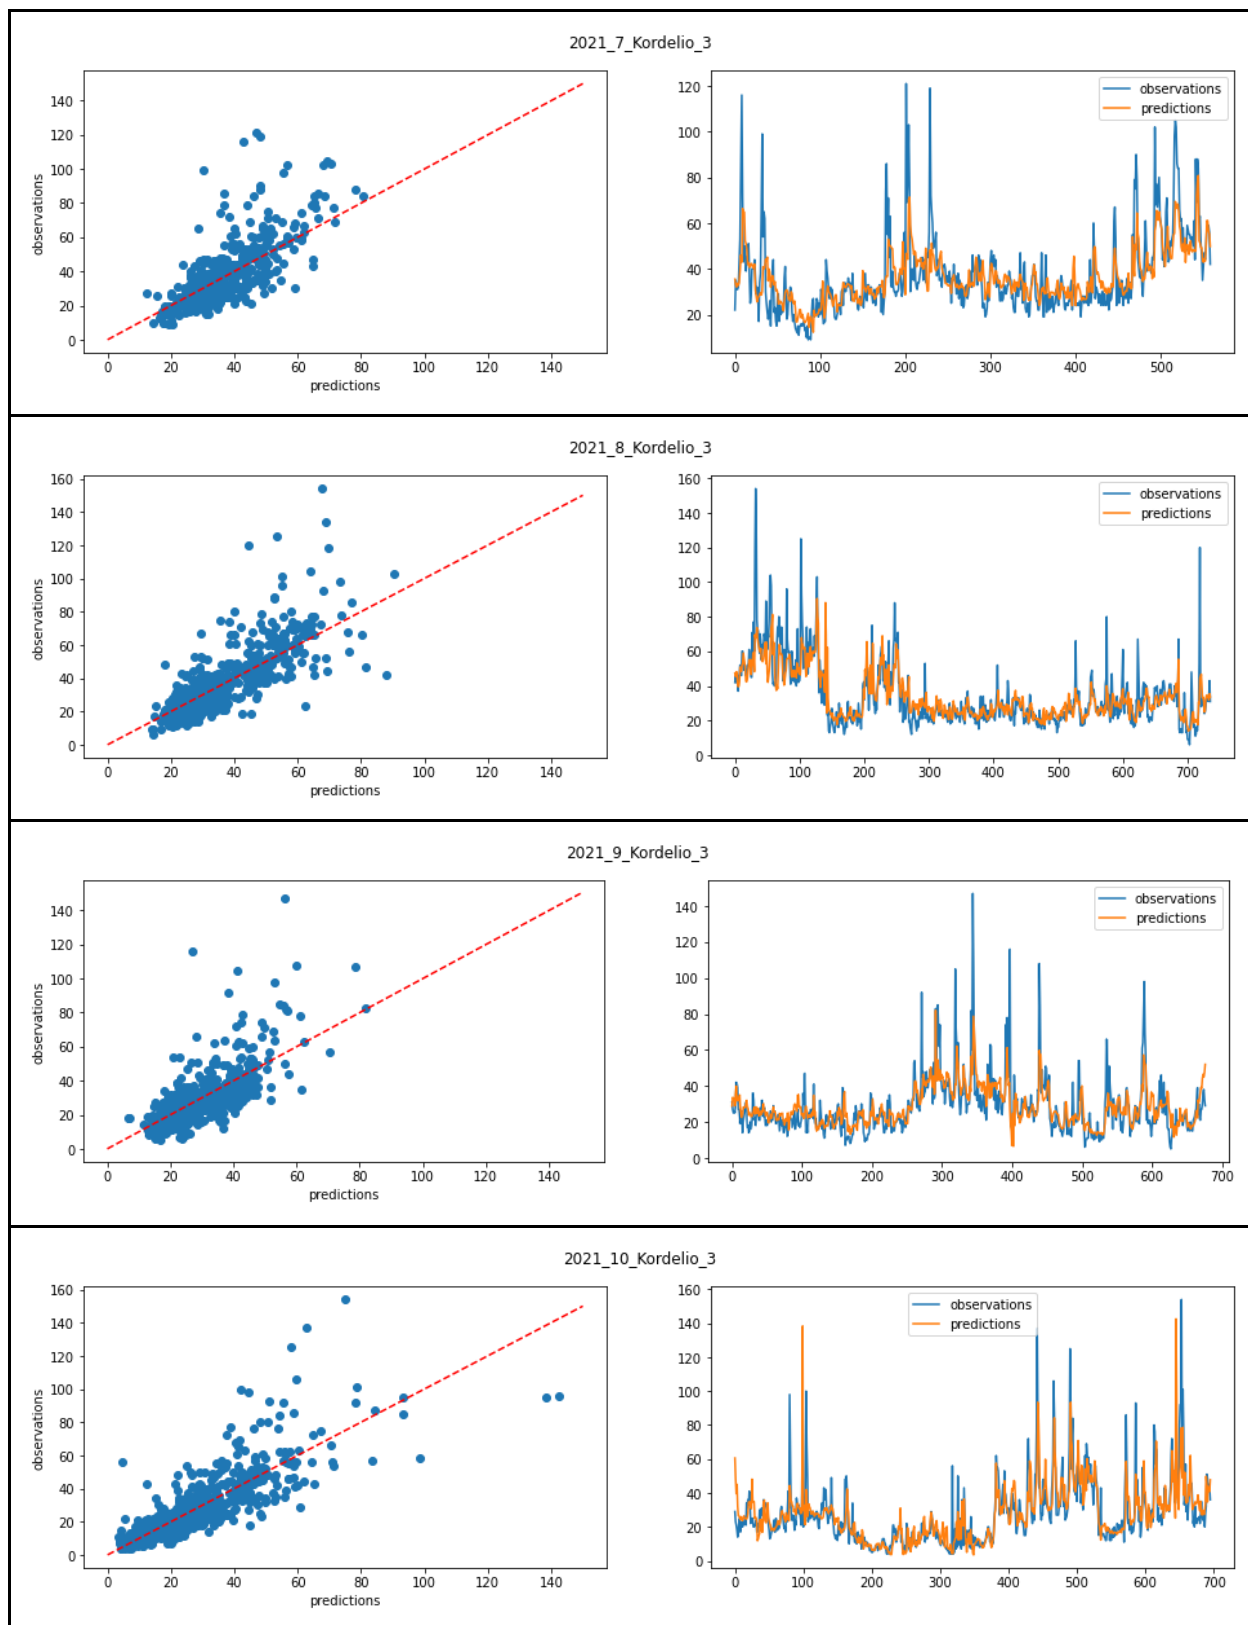

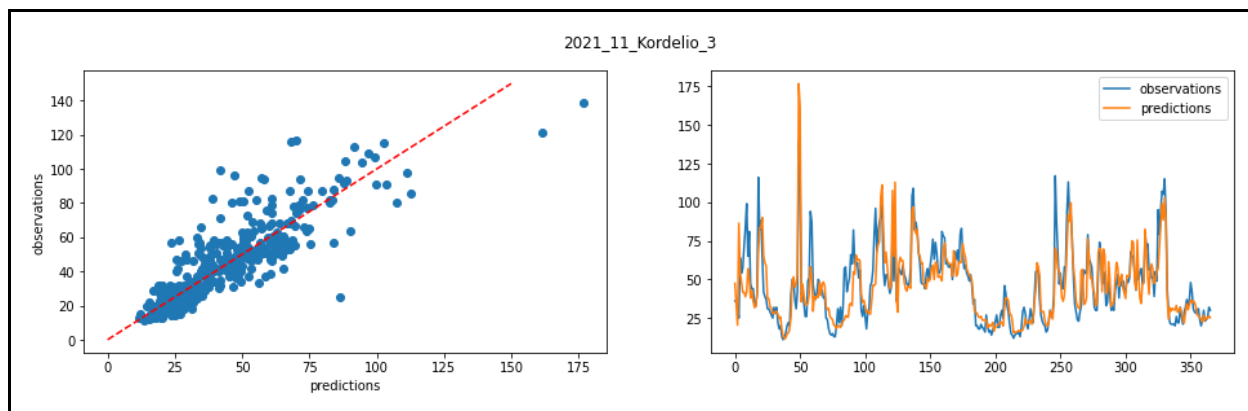

Figure S4: The calibrated output against reference readings for visual validation is presented in the right subfigure and the linearity is presented in the left. The results refer to the  $PM_{10}$  levels for the AGIA SOFIA collocated node-reference pair for the ideal scenario.

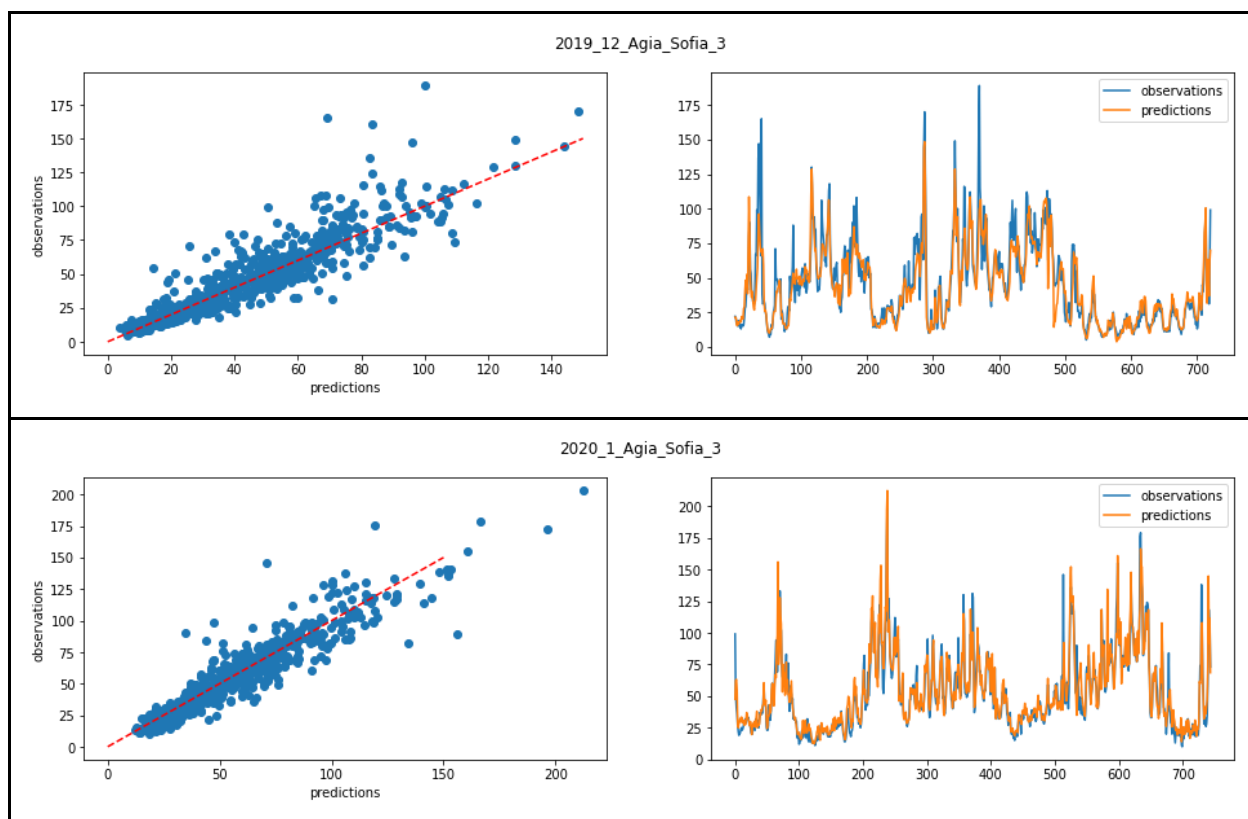

2020\_2\_Agia\_Sofia\_3

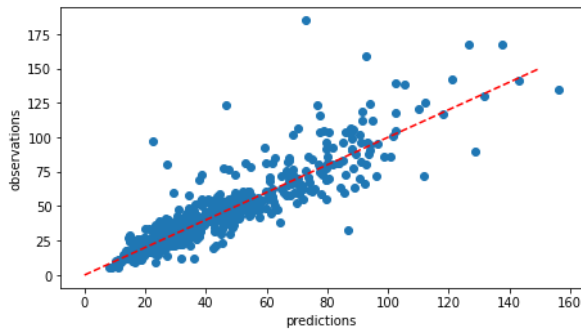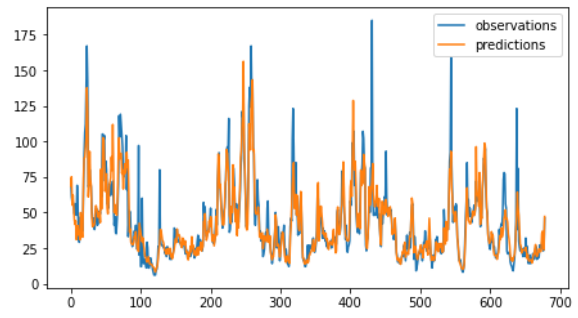

2020\_3\_Agia\_Sofia\_3

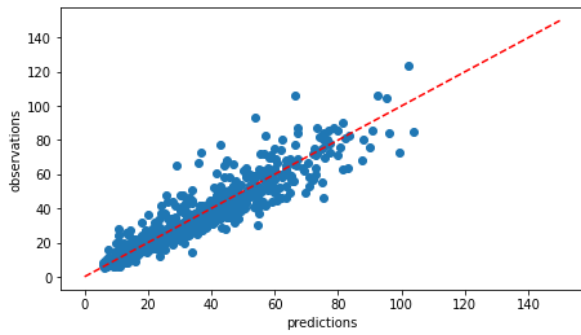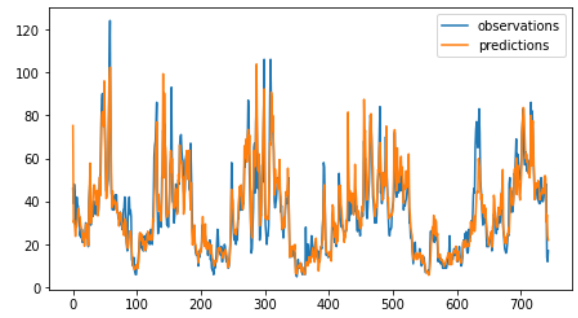

2020\_4\_Agia\_Sofia\_3

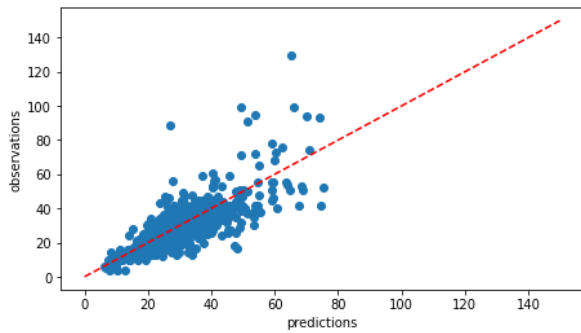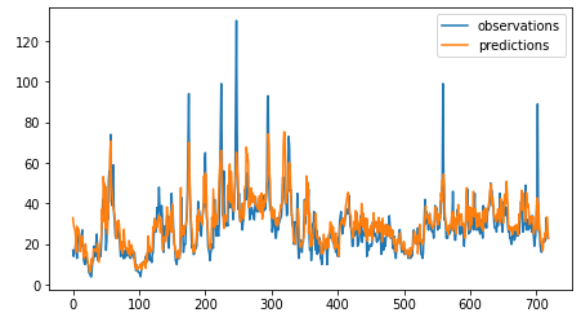

2020\_5\_Agia\_Sofia\_3

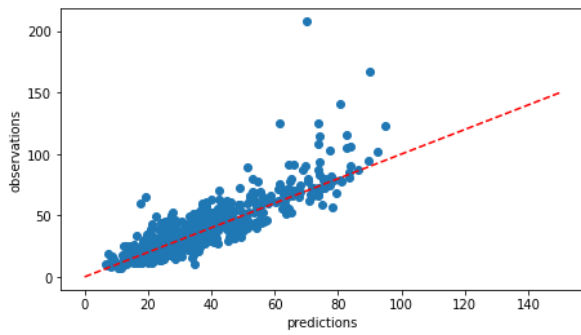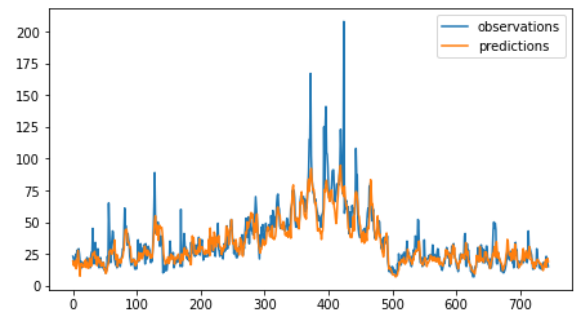

2020\_6\_Agia\_Sofia\_3

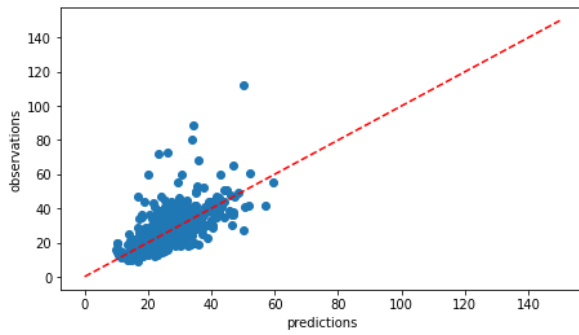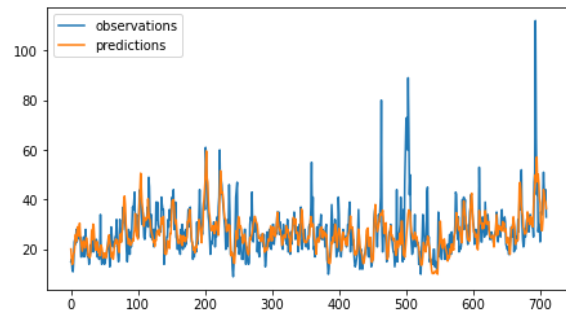

2020\_7\_Agia\_Sofia\_3

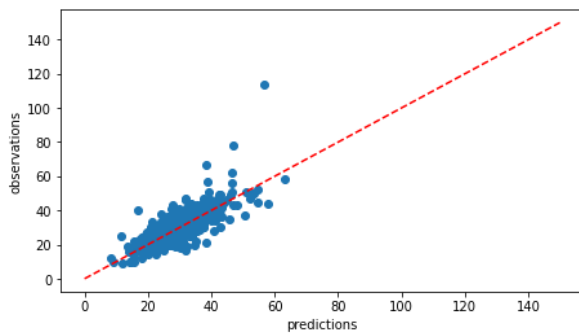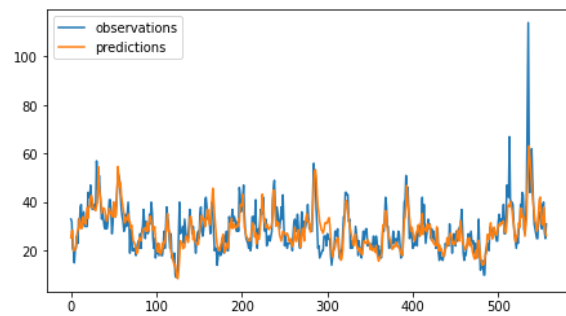

2020\_12\_Agia\_Sofia\_3

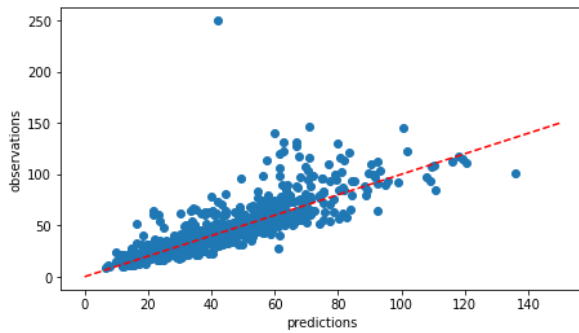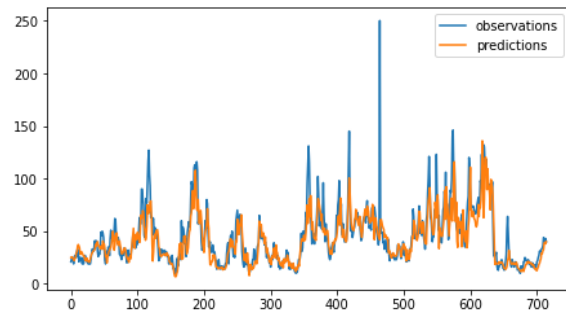

2021\_1\_Agia\_Sofia\_3

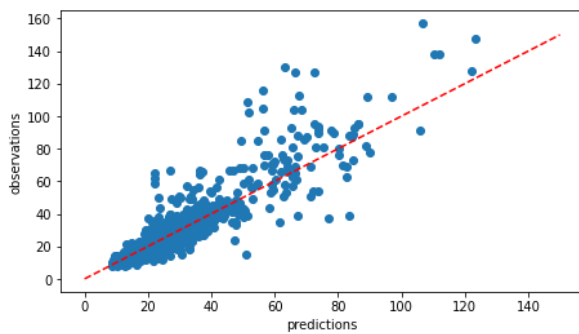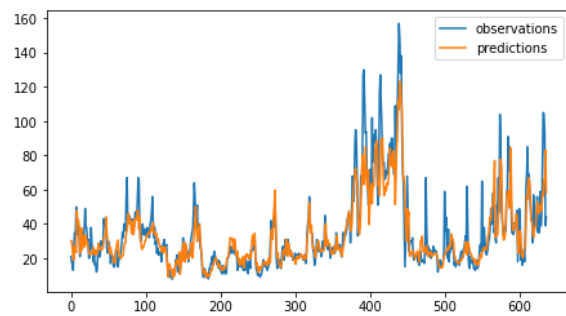

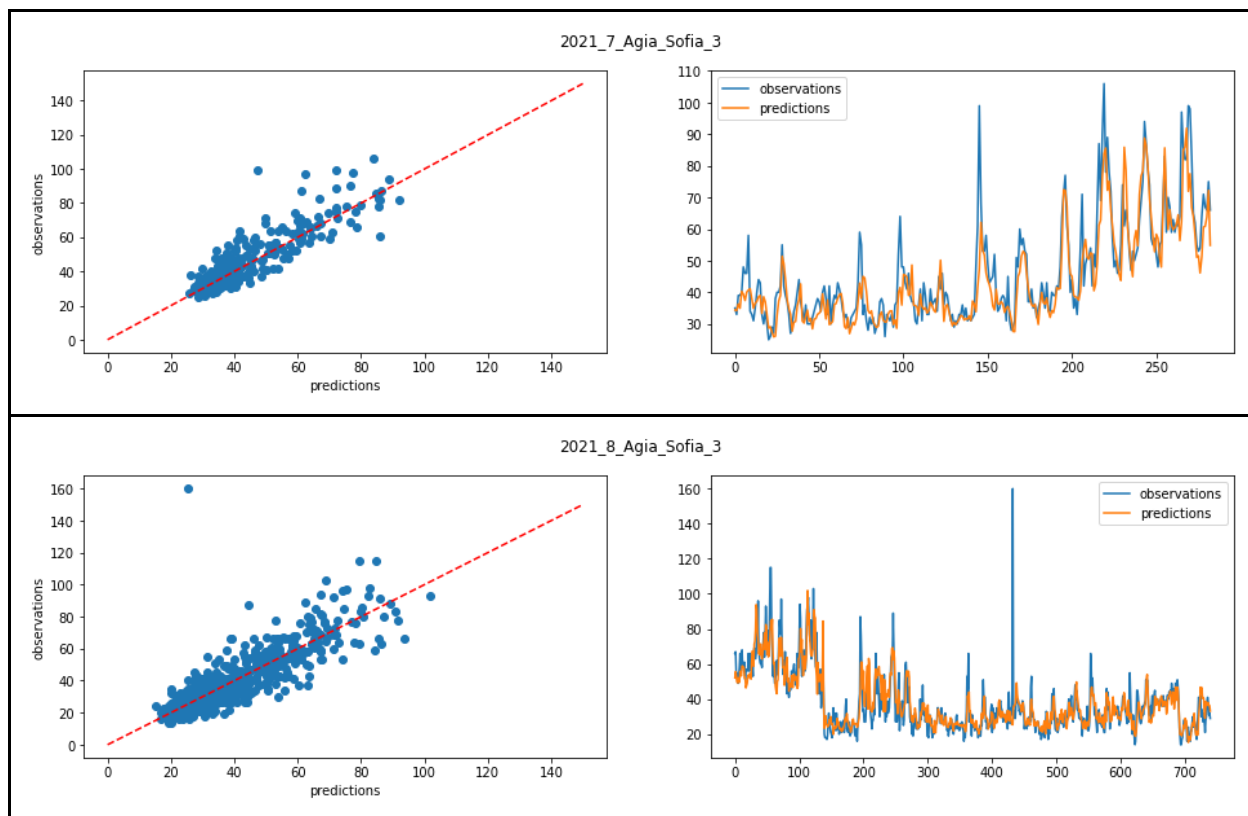

Figure S5: The calibrated output against reference readings for visual validation is presented in the right subfigure and the linearity is presented in the left. The results refer to the PM<sub>10</sub> levels for the SINDOS collocated node-reference pair for the ideal scenario.

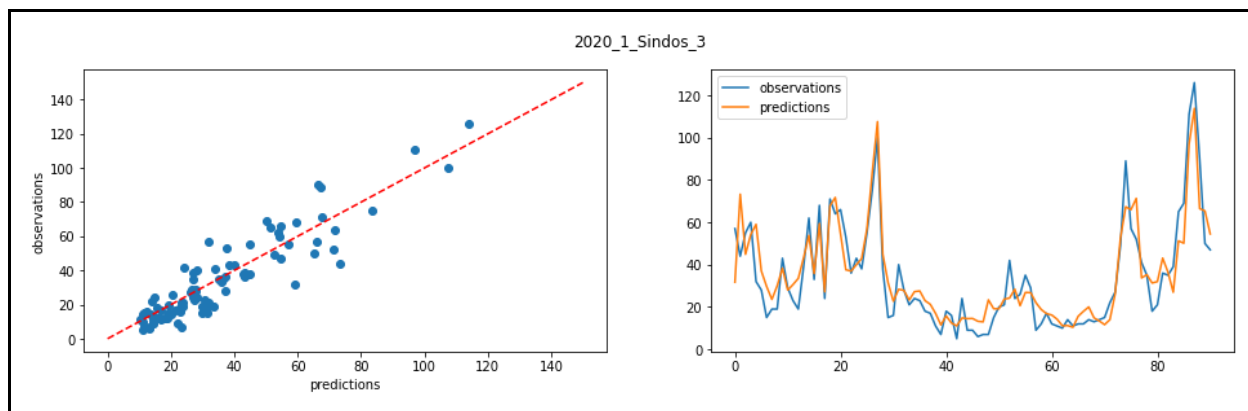

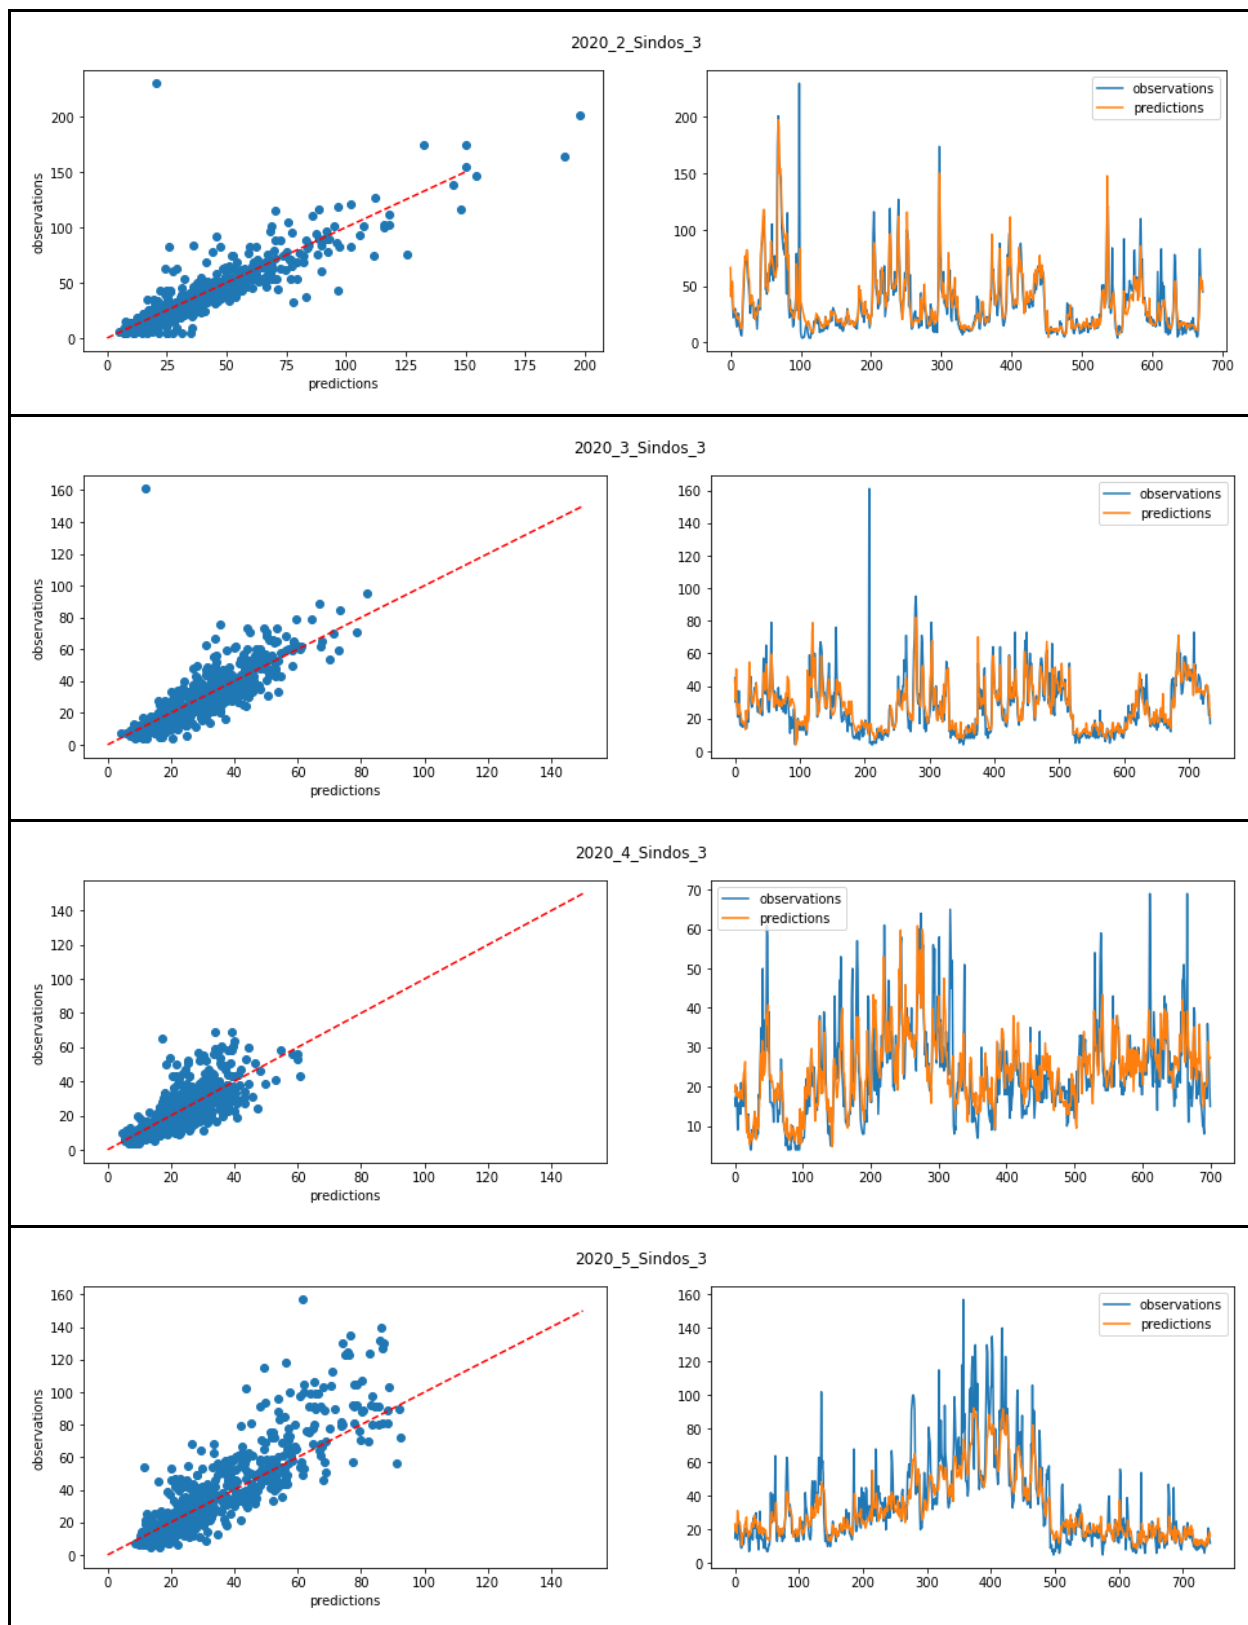

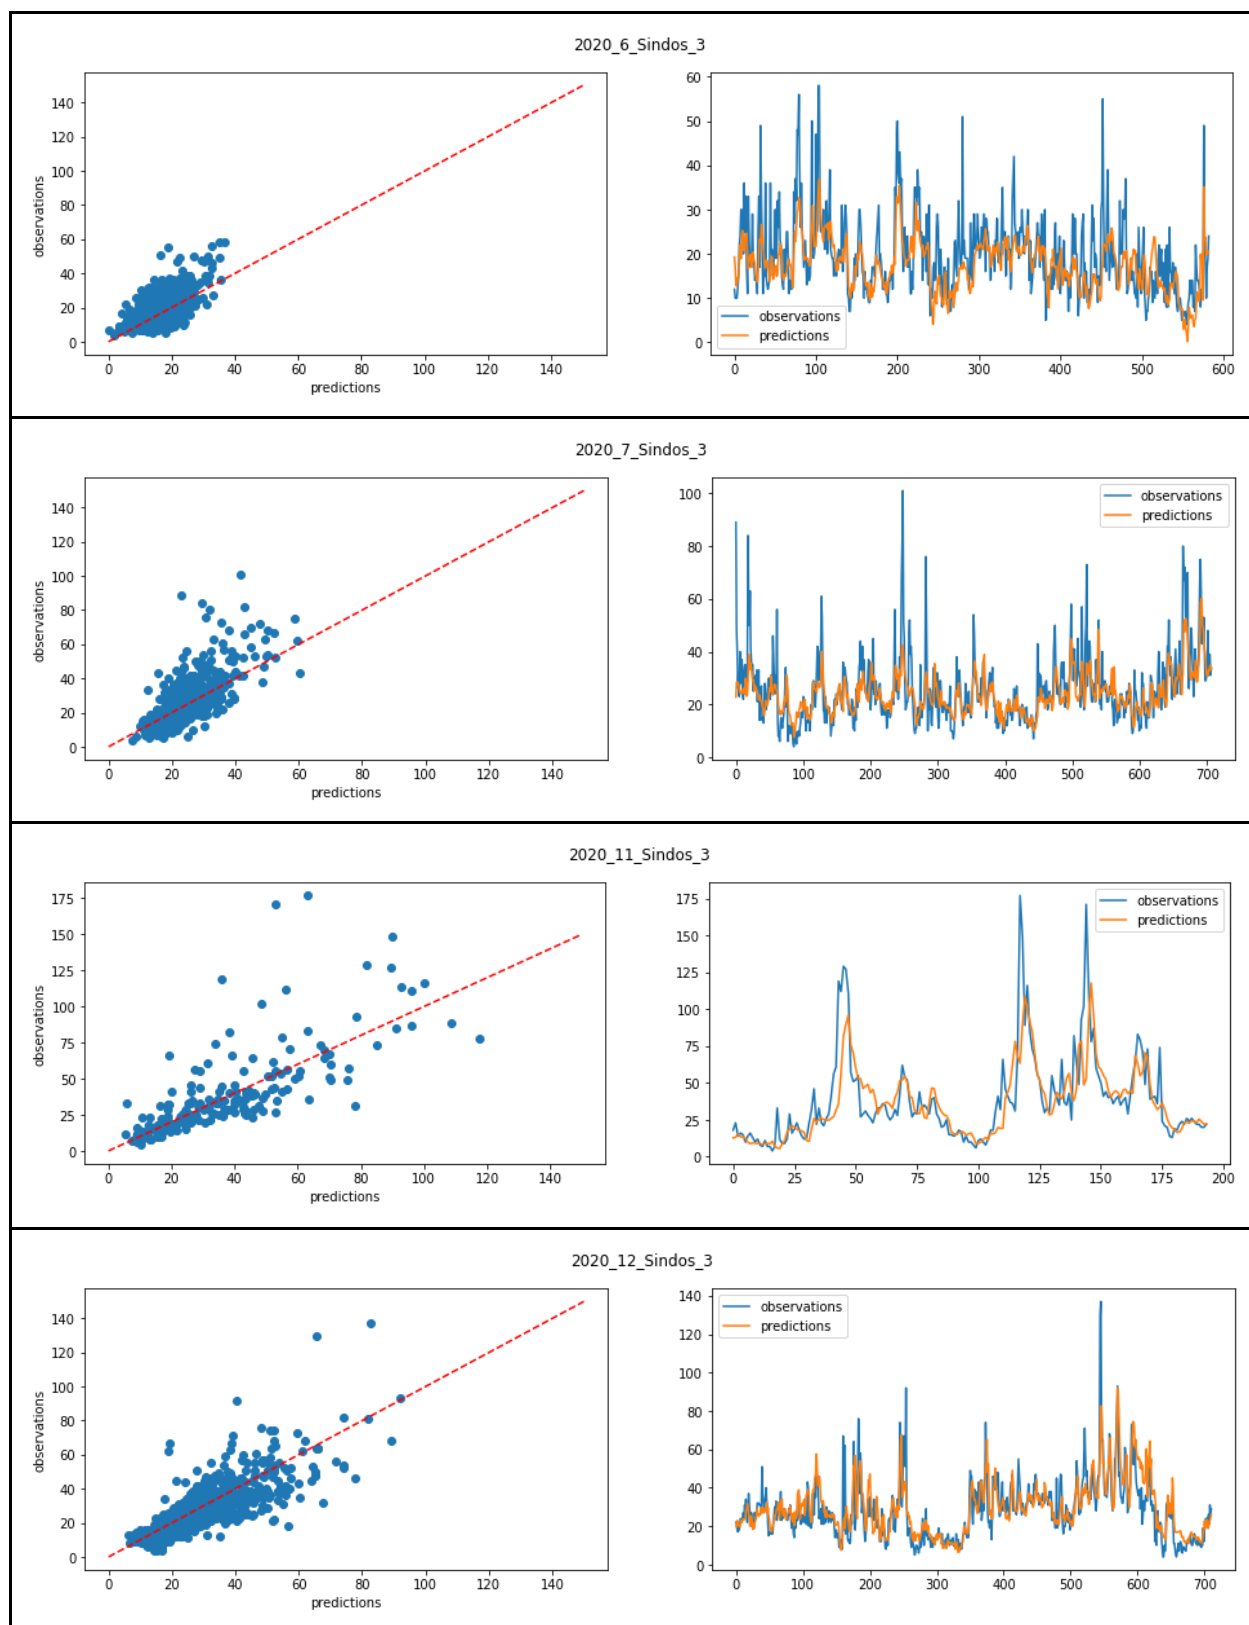

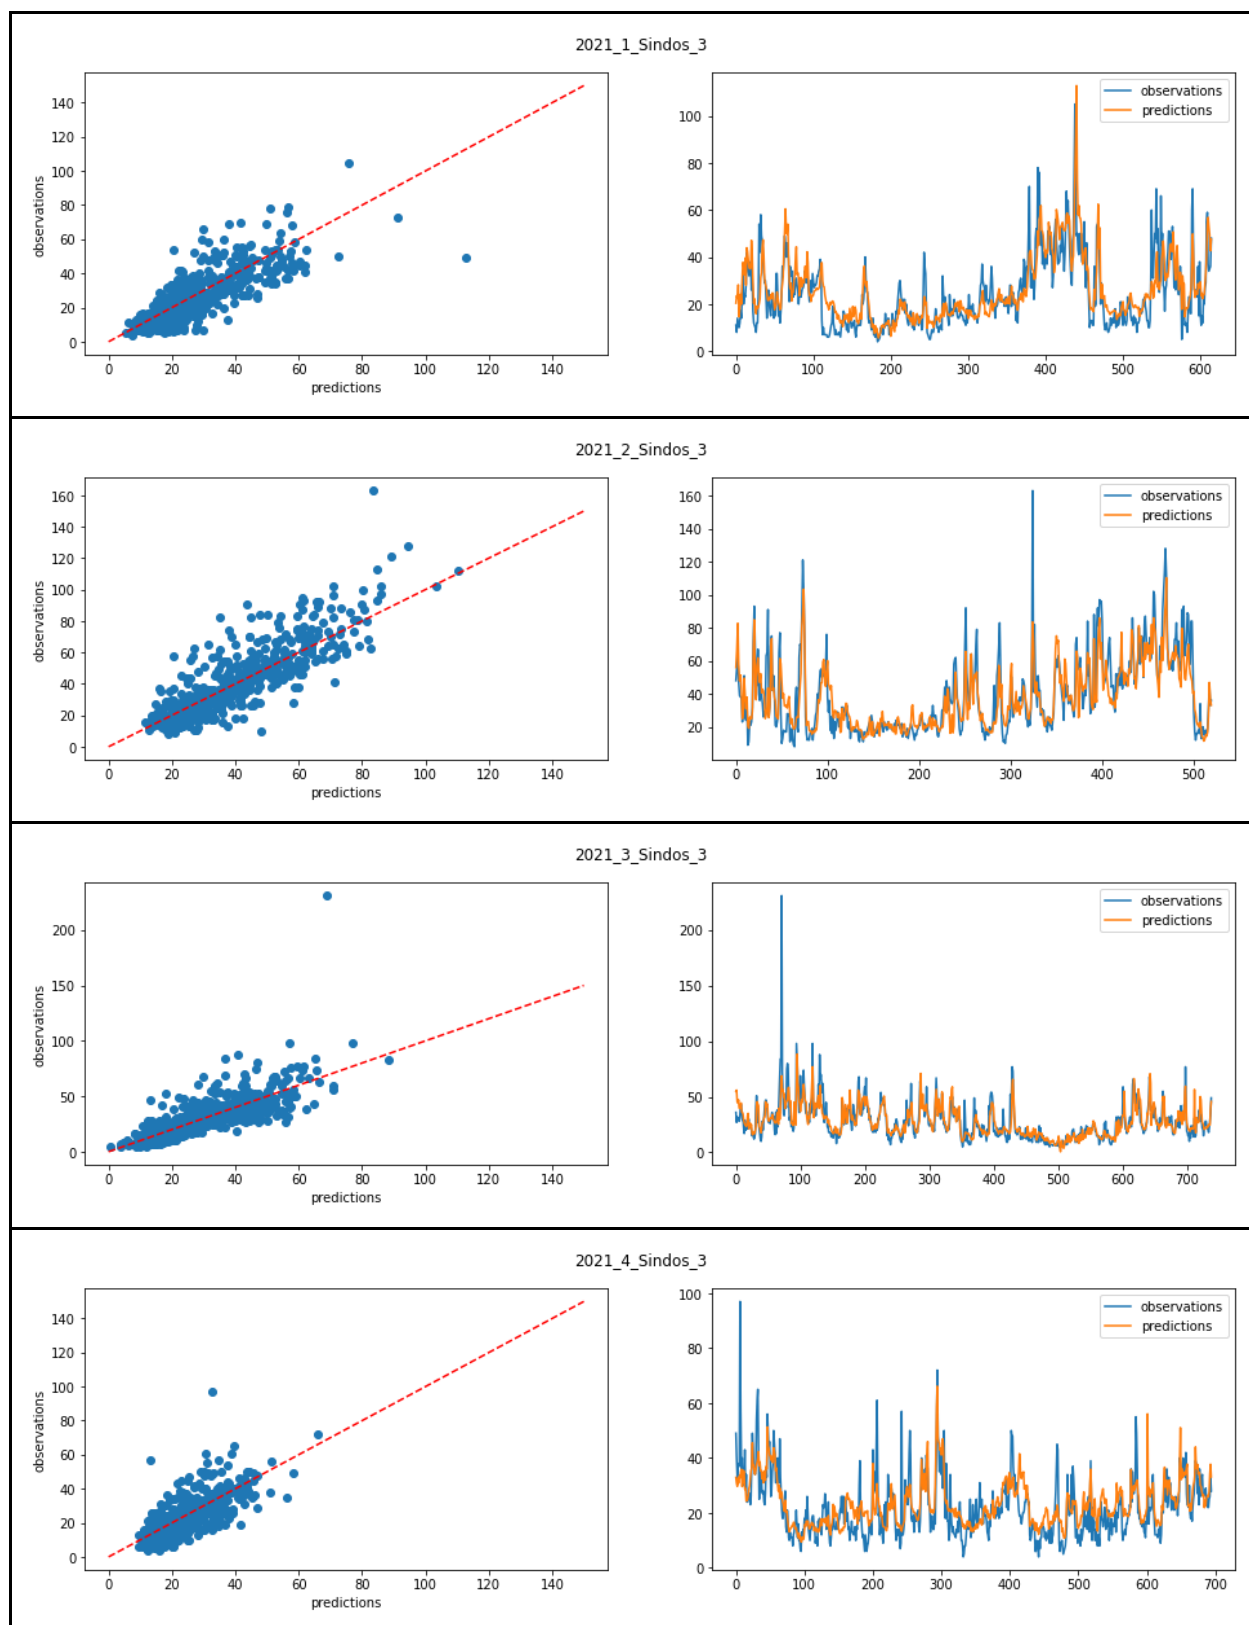

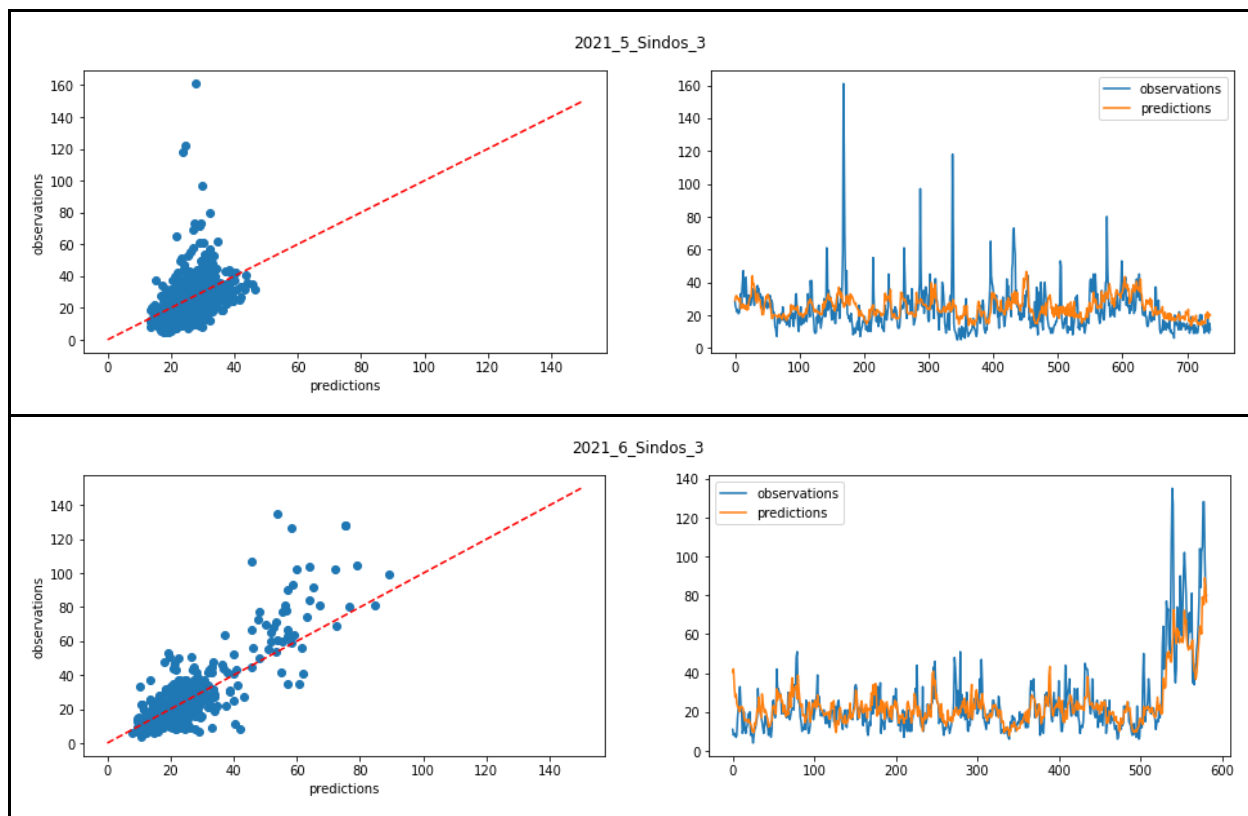

Figure S6: The calibrated output against reference readings for visual validation is presented in the right subfigure and the linearity is presented in the left. The results refer to the  $O_3$  levels for the KORDELIO collocated node-reference pair for the ideal scenario.

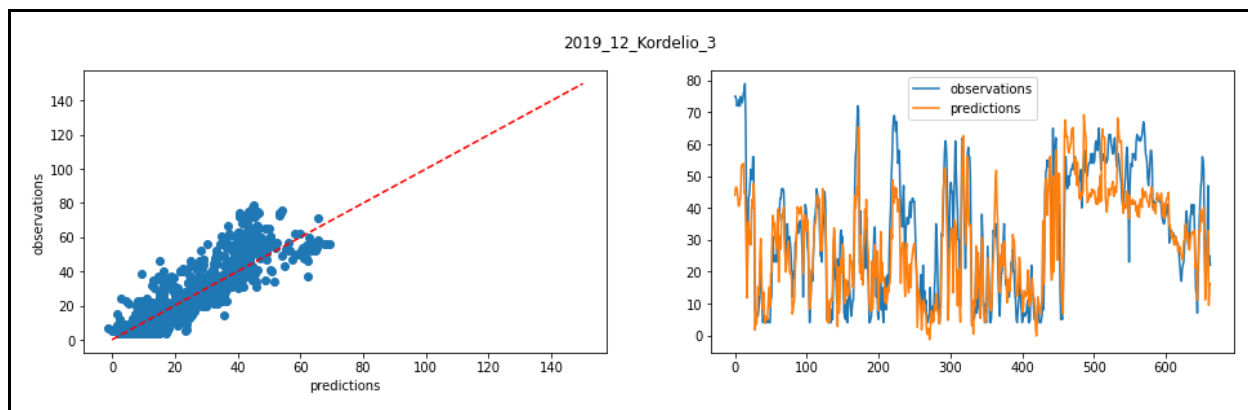

2019\_13\_Kordelio\_3

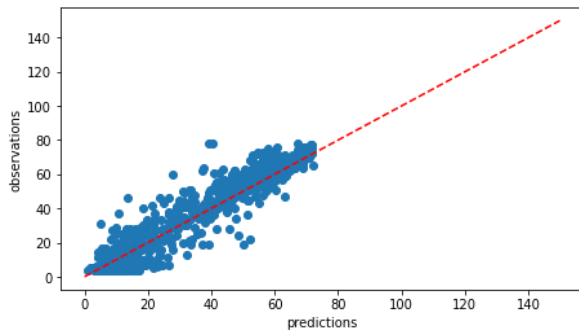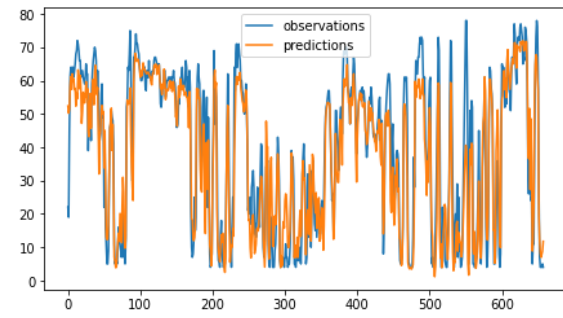

2020\_2\_Kordelio\_3

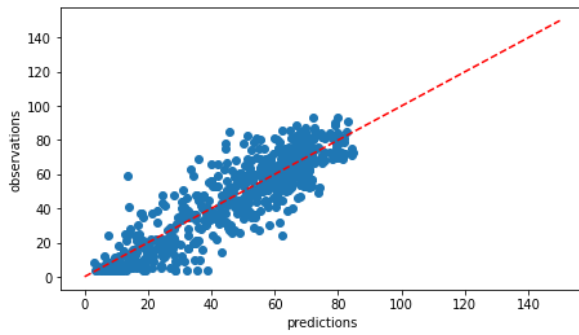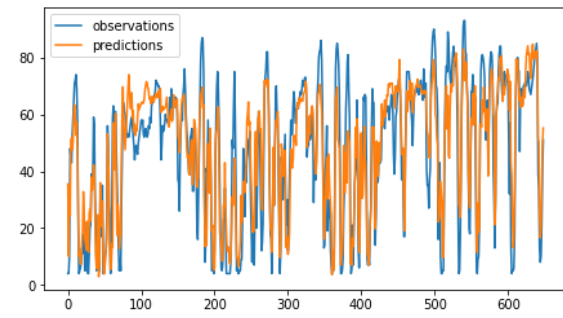

2020\_3\_Kordelio\_3

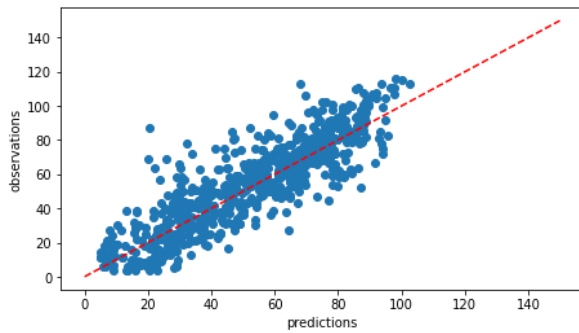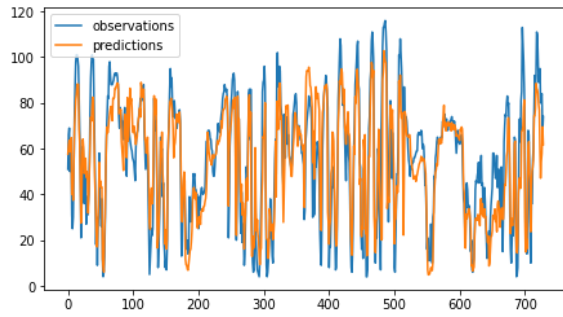

2020\_4\_Kordelio\_3

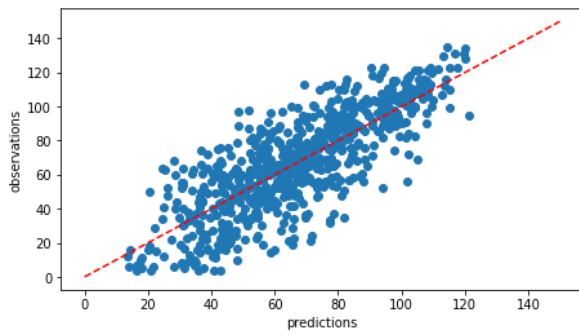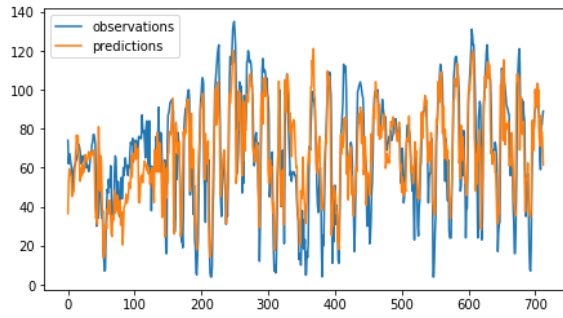

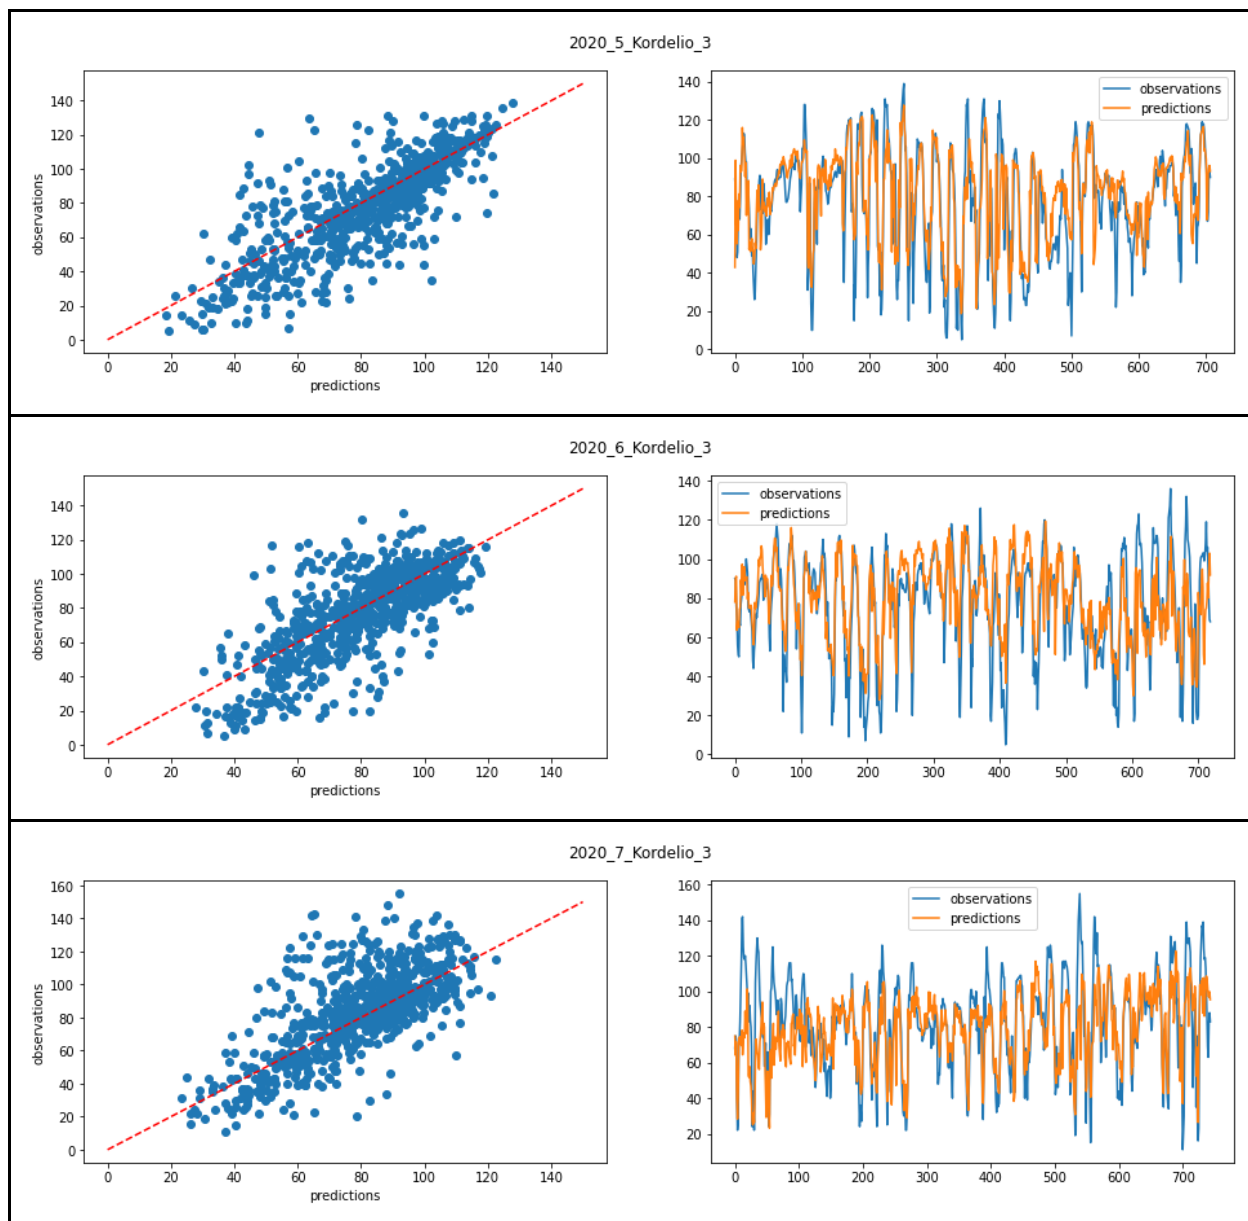

Figure S7: The calibrated output against reference readings for visual validation is presented in the right subfigure and the linearity is presented in the left. The results refer to the  $O_3$  levels for the AGIA SOFIA collocated node-reference pair for the ideal scenario.

2019\_12\_Agia\_Sofia\_3

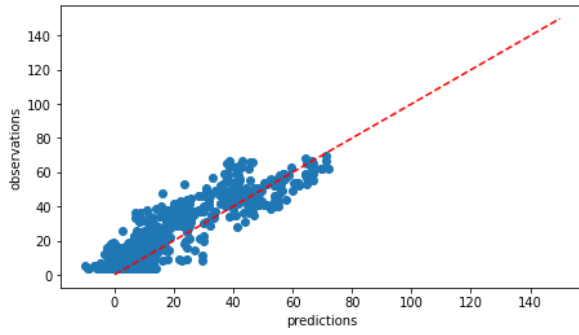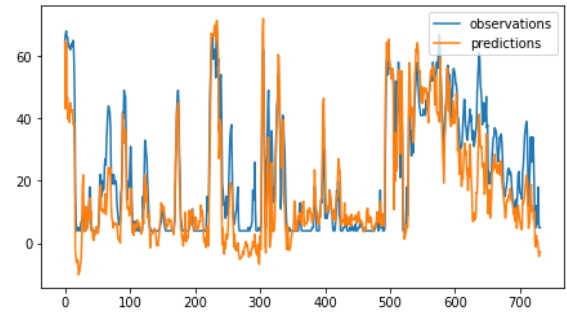

2019\_13\_Agia\_Sofia\_3

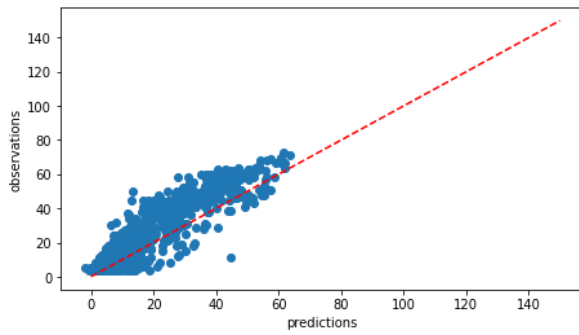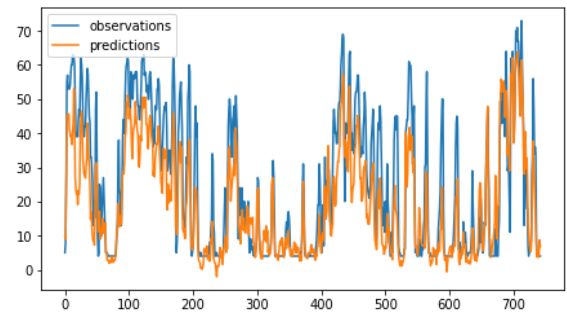

2020\_2\_Agia\_Sofia\_3

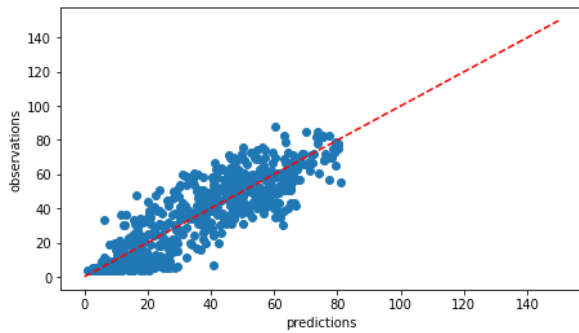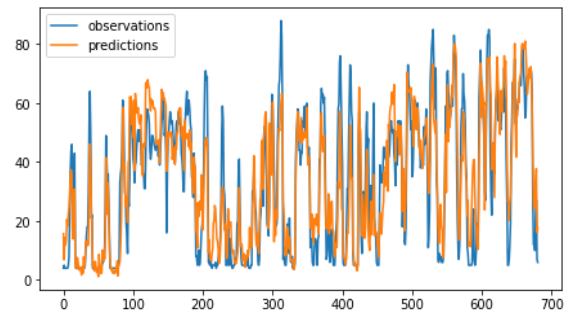

2020\_3\_Agia\_Sofia\_3

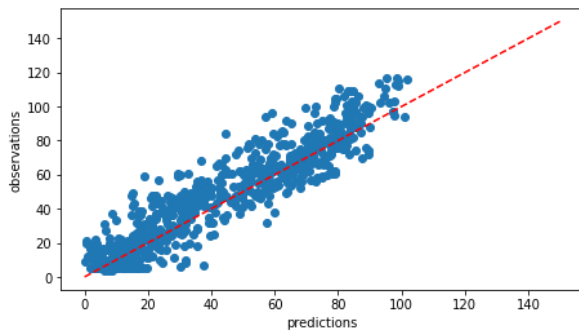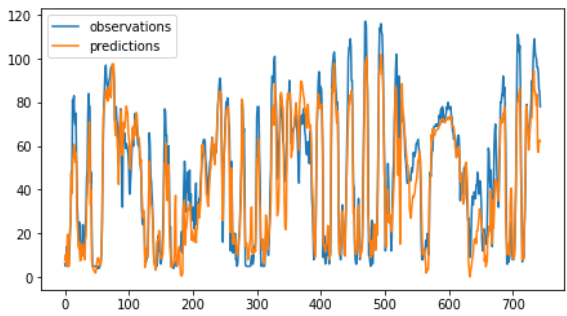

2020\_4\_Agia\_Sofia\_3

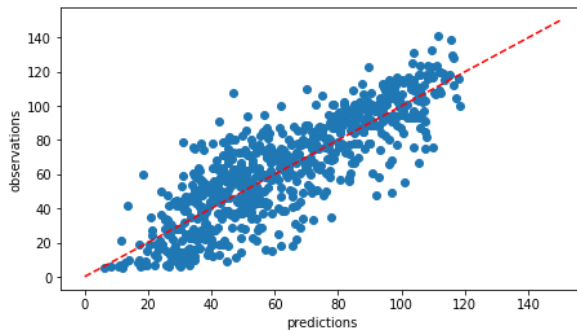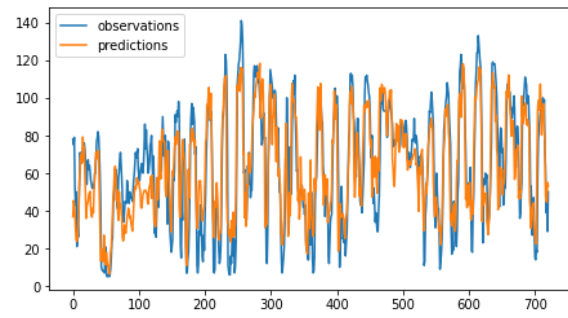

2020\_5\_Agia\_Sofia\_3

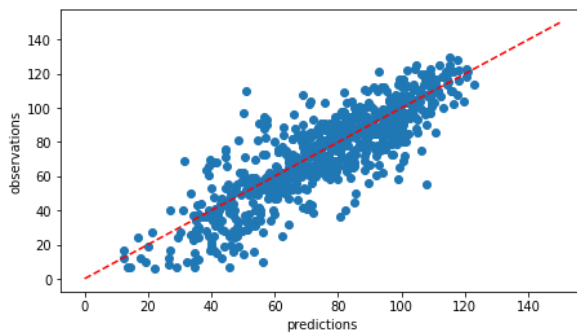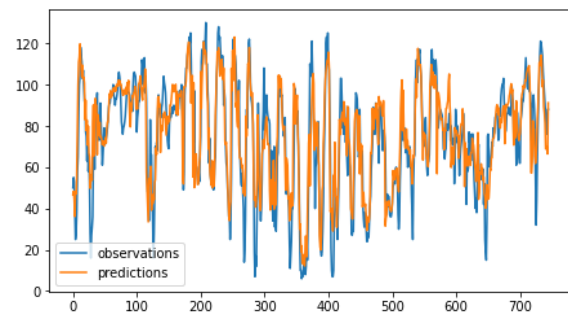

2020\_6\_Agia\_Sofia\_3

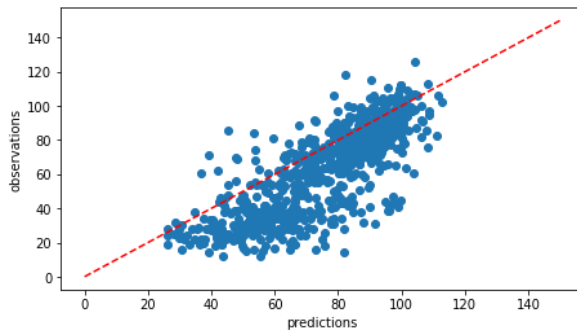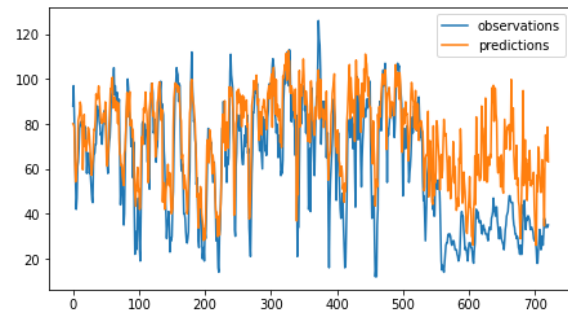

2020\_7\_Agia\_Sofia\_3

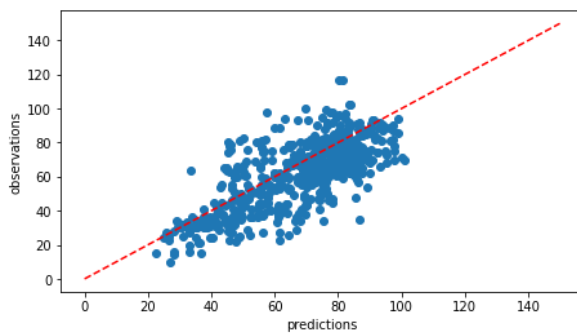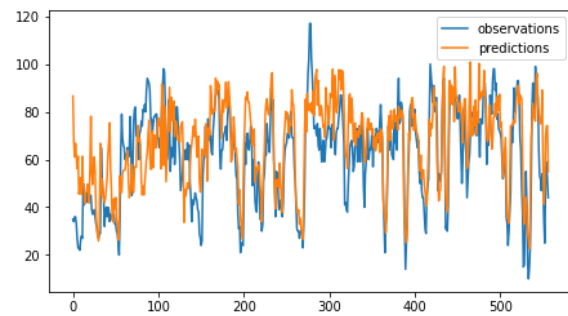

Figure S8: The calibrated output against reference readings for visual validation is presented in the right subfigure and the linearity is presented in the left. The results refer to the O<sub>3</sub> levels for the SINDOS collocated node-reference pair for the ideal scenario.

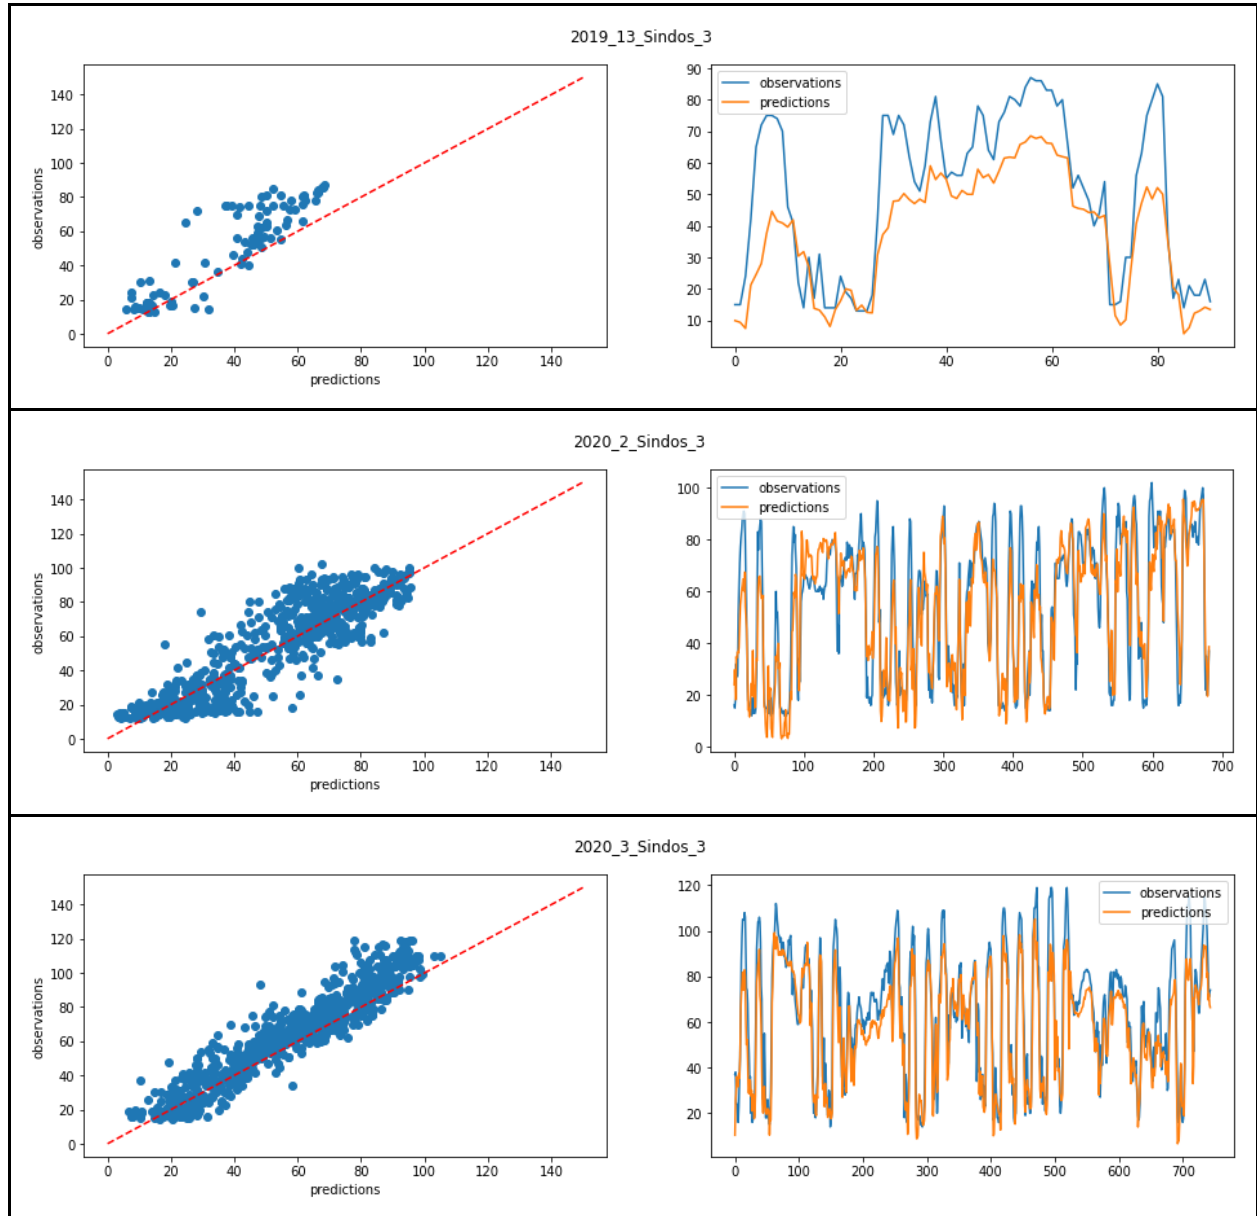

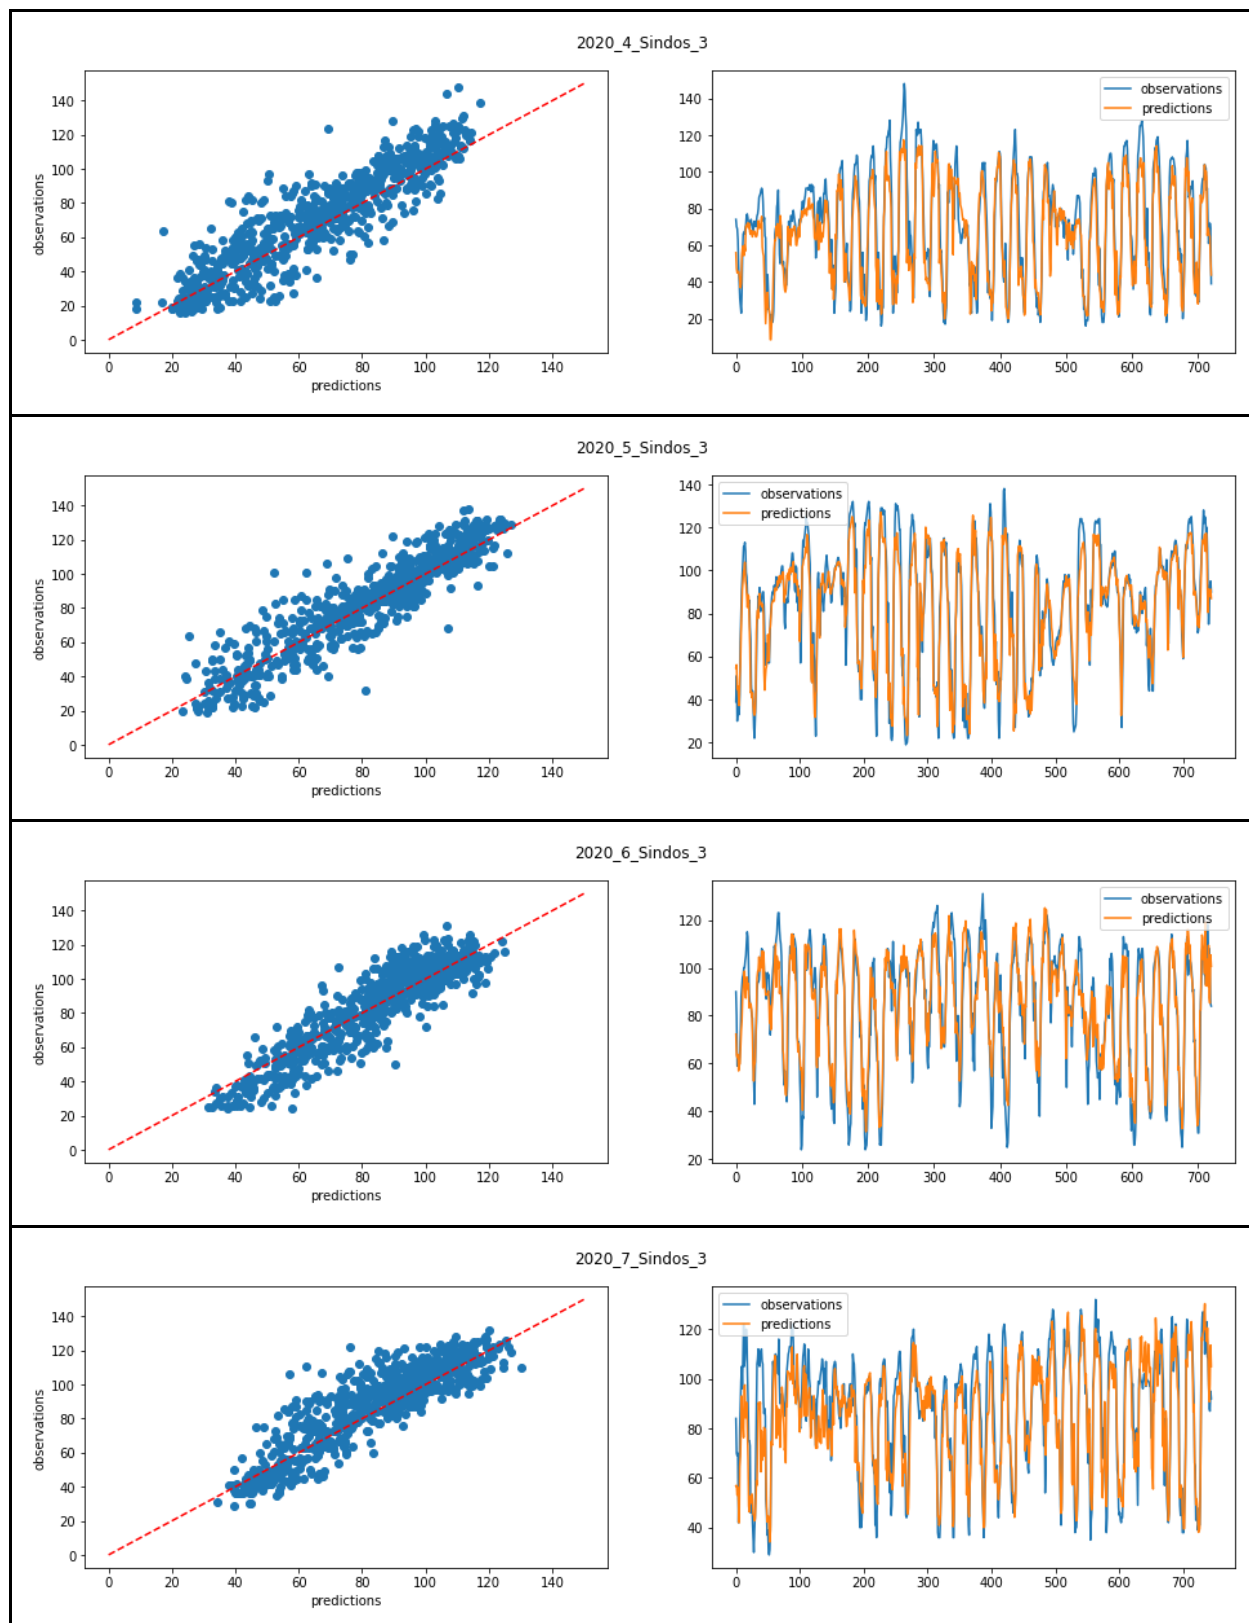

Supplement: s1 [file s1 › atmosphere-1599762-supplementary (1).pdf]
